# Supplementary material
Source: Royal Society of Chemistry journal article supplement (doi:10.1039/d6dt00484a)
Supplement: d6dt00484a1.pdf [file d6dt00484a1.pdf]

## Supporting Information

### Weakly Coordinating Borophosphates – $\text{Ca}_{0.5}\text{M}(\text{H}_2\text{O})_2[\text{B}(\text{PO}_4)_2]\cdot\text{H}_2\text{O}$ (M = Mg, Mn, Co, Zn, Cd)

Authors: Vivien Wessels,<sup>[a]</sup> Martina Mikuta<sup>[a]</sup> and Henning A. Höpfe\*<sup>[a]</sup>

<sup>[a]</sup> Professur für Festkörperchemie und Materialwissenschaften, Institute of Physics, Universität Augsburg, Universitätsstraße 1, 86159 Augsburg, Germany

### Table of Contents

|                                                                |    |
|----------------------------------------------------------------|----|
| Powder X-ray Diffraction Pattern.....                          | 2  |
| Rietveld Refinement.....                                       | 3  |
| Crystal Data and Structure Refinements.....                    | 4  |
| Crystal Images.....                                            | 10 |
| UV-Vis Spectra and Tanabe-Sugano Analysis .....                | 11 |
| Thermal Analysis.....                                          | 13 |
| Energy Dispersive X-ray Spectroscopy .....                     | 15 |
| Selected Ionic Radii after Shannon .....                       | 23 |
| MAPLE Calculations.....                                        | 24 |
| Symmetry Reduction and Systematically Absent Reflections ..... | 25 |
| References.....                                                | 29 |

## Powder X-ray Diffraction Pattern

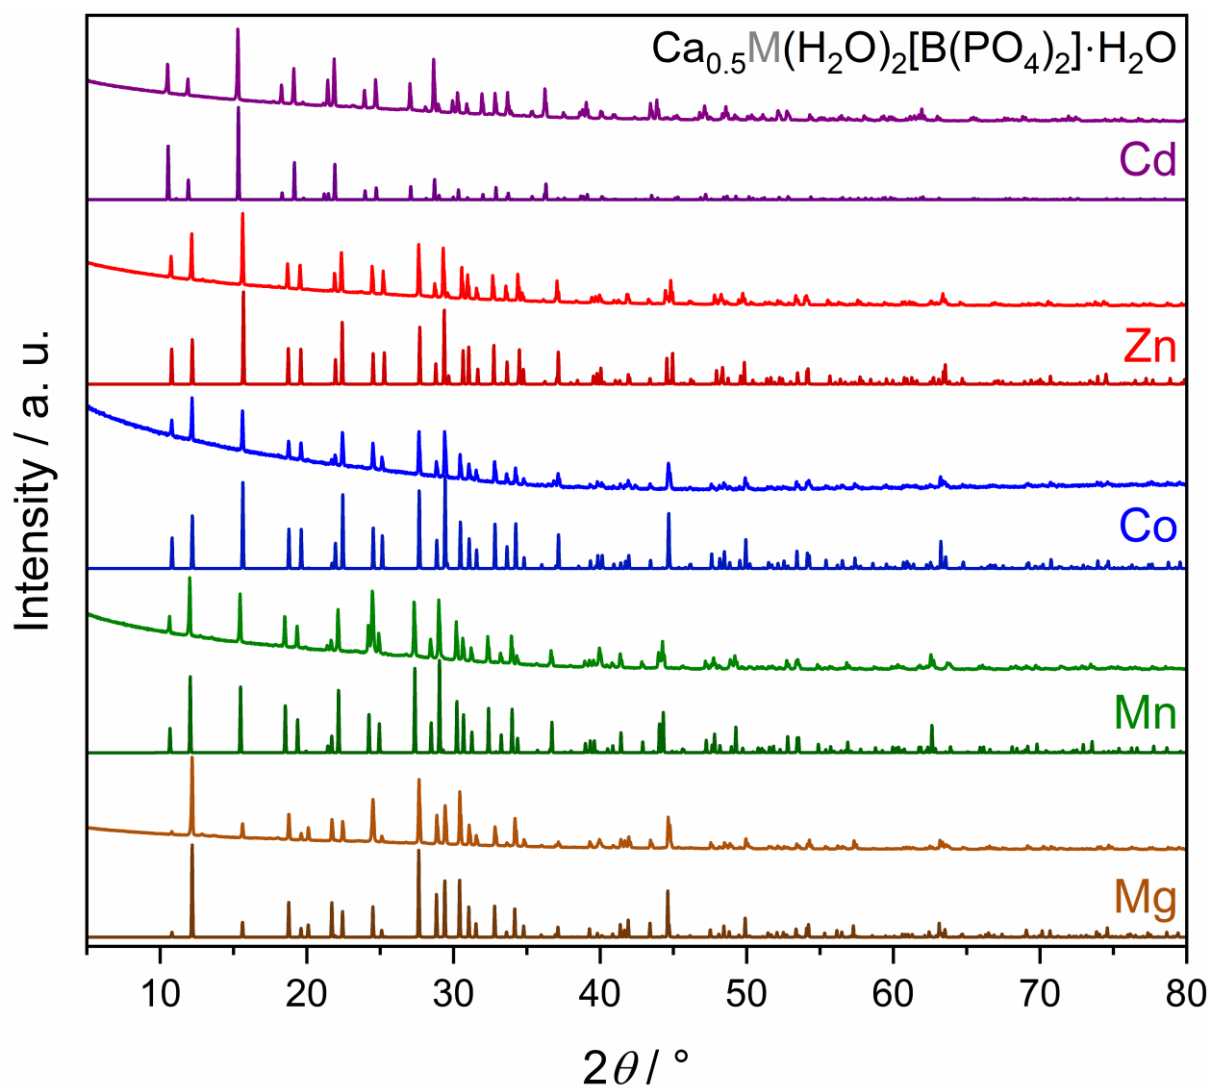

**Figure S1.** Powder X-ray diffraction patterns of  $\text{Ca}_{0.5}\text{M}(\text{H}_2\text{O})_2[\text{B}(\text{PO}_4)_2]\cdot\text{H}_2\text{O}$  (M = Mg, Mn, Co, Zn, Cd) compared to the calculated out of single-crystal data.

## Rietveld Refinement

**Table S1.** Crystal data and structure refinement of  $\text{Ca}_{0.5}\text{Zn}(\text{H}_2\text{O})_2[\text{B}(\text{PO}_4)_2]\cdot\text{H}_2\text{O}$  determined from powered XRD data via Rietveld refinement. Respective standard deviations are given in parentheses

|                                                |                         |
|------------------------------------------------|-------------------------|
| molar weight / $\text{g}\cdot\text{mol}^{-1}$  | 340.21                  |
| Temperature / K                                | 300(2)                  |
| space group                                    | $P3_121$ (no. 152)      |
| $a$ / $\text{\AA}$                             | 9.4806(6)               |
| $c$ / $\text{\AA}$                             | 15.6269(3)              |
| $V$ / $\text{\AA}^3$                           | 1216.41(2)              |
| $Z$                                            | 6                       |
| $\rho$ / $\text{g}\cdot\text{cm}^{-3}$         | 2.858(11)               |
| radiation; wavelength $\lambda$ / $\text{\AA}$ | Cu- $K\alpha$ ; 1.54184 |
| diffractometer                                 | Bruker D8 Advance       |
| $\theta$ range / $^\circ$                      | 2.5-40                  |
| $R_{\text{Bragg}}$                             | 0.019                   |
| $R_p$                                          | 0.020                   |
| $R_{\text{wp}}$                                | 0.032                   |
| Goof                                           | 3.30                    |
| S.O.F Ca1A                                     | 0.249                   |
| S.O.F Ca1B                                     | 0.251                   |

## Crystal Data and Structure Refinements

**Table S2.** Atomic coordinates, Wyckoff symbols and isotropic displacement parameters  $U_{eq} / \text{\AA}^2$  in  $\text{Ca}_{0.5}\text{Mg}(\text{H}_2\text{O})_2[\text{B}(\text{PO}_4)_2] \cdot \text{H}_2\text{O}$ . Standard deviations are given in parentheses

| Atom | Wyckoff symbol | S.O.F.     | x           | y           | z           | $U_{eq}$   |
|------|----------------|------------|-------------|-------------|-------------|------------|
| Mg1  | 6c             |            | 0.89782(13) | 0.44890(16) | 0.58336(7)  | 0.0126(3)  |
| Ca1A | 6c             | 0.2563(17) | 0.8891(4)   | 0.2498(4)   | 0.74382(17) | 0.0202(4)  |
| Ca1B | 6c             | 0.2437(17) | 0.7514(4)   | 0.1108(5)   | 0.75595(18) | 0.0202(4)  |
| P1   | 6c             |            | 0.82964(11) | 0.6130(1)   | 0.74707(5)  | 0.0085(2)  |
| P2   | 6c             |            | 0.78303(11) | 0.61304(10) | 1.08612(5)  | 0.0086(2)  |
| O1   | 6c             |            | 0.7073(3)   | 0.1955(3)   | 0.61647(16) | 0.0205(6)  |
| H11  | 6c             |            | 0.601(3)    | 0.190(5)    | 0.6117(19)  | 0.0250     |
| H12  | 6c             |            | 0.714(4)    | 0.166(5)    | 0.6758(11)  | 0.0250     |
| O2   | 6c             |            | 0.7072(3)   | 0.5119(3)   | 0.54972(15) | 0.0199(6)  |
| H21  | 6c             |            | 0.616(3)    | 0.409(3)    | 0.5283(19)  | 0.0240     |
| H22  | 6c             |            | 0.668(4)    | 0.527(4)    | 0.6059(13)  | 0.0240     |
| O11  | 6c             |            | 0.8193(3)   | 0.5833(3)   | 0.84547(13) | 0.0105(5)  |
| O12  | 6c             |            | 0.8588(3)   | 0.4848(3)   | 0.70781(14) | 0.0162(6)  |
| O13  | 6c             |            | 0.6817(3)   | 0.6169(3)   | 0.71478(13) | 0.0149(5)  |
| O14  | 6c             |            | 0.9782(3)   | 0.7878(3)   | 0.73164(14) | 0.0112(5)  |
| O21  | 6c             |            | 0.7644(3)   | 0.5839(3)   | 0.98784(12) | 0.0106(5)  |
| O22  | 6c             |            | 0.7873(3)   | 0.8086(3)   | 0.89901(13) | 0.0103(5)  |
| O23  | 6c             |            | 0.6260(3)   | 0.4848(3)   | 1.12533(14) | 0.0160(6)  |
| O24  | 6c             |            | 0.9357(3)   | 0.6178(3)   | 1.11842(14) | 0.0142(5)  |
| B1   | 6c             |            | 0.8494(5)   | 0.6977(4)   | 0.9169(2)   | 0.0090(7)  |
| O3   | 3a             |            | 0.8513(6)   | 1           | 2/3         | 0.0661(18) |
| H31  | 6c             | 0.5        | 0.766(9)    | 0.992(11)   | 0.707(5)    | 0.0790     |
| H32  | 6c             | 0.5        | 0.838(13)   | 0.888(6)    | 0.669(6)    | 0.0790     |
| O4   | 3b             |            | 0.8510(6)   | 0.8510(6)   | 1/2         | 0.0703(18) |
| H41  | 6c             | 0.5        | 0.898(12)   | 0.969(4)    | 0.487(7)    | 0.0840     |
| H42  | 6c             | 0.5        | 0.945(8)    | 0.832(11)   | 0.492(8)    | 0.0840     |

**Table S3.** Anisotropic displacement parameters  $U_{ij} / \text{\AA}^2$  in  $\text{Ca}_{0.5}\text{Mg}(\text{H}_2\text{O})_2[\text{B}(\text{PO}_4)_2] \cdot \text{H}_2\text{O}$ . Standard deviations are given in parentheses

| Atom | $U_{11}$   | $U_{22}$   | $U_{33}$   | $U_{12}$   | $U_{13}$    | $U_{23}$    |
|------|------------|------------|------------|------------|-------------|-------------|
| Mg1  | 0.0099(5)  | 0.0134(7)  | 0.0139(5)  | 0.0054(6)  | 0.0001(4)   | -0.0055(4)  |
| Ca1A | 0.0248(12) | 0.0264(12) | 0.0130(8)  | 0.0155(9)  | 0.0001(8)   | -0.0001(8)  |
| Ca1B | 0.0248(12) | 0.0264(12) | 0.0130(8)  | 0.0155(9)  | 0.0001(8)   | -0.0001(8)  |
| P1   | 0.0086(5)  | 0.0086(4)  | 0.0069(3)  | 0.0031(4)  | 0.0004(3)   | -0.0011(3)  |
| P2   | 0.0113(5)  | 0.0082(4)  | 0.0066(3)  | 0.0050(4)  | 0.0018(3)   | 0.0008(3)   |
| O1   | 0.0150(15) | 0.0237(15) | 0.0221(13) | 0.0092(13) | -0.0005(11) | -0.0058(11) |
| O2   | 0.0160(15) | 0.0187(15) | 0.0216(13) | 0.0062(13) | -0.0007(11) | -0.0083(11) |
| O11  | 0.0131(13) | 0.0087(12) | 0.0075(9)  | 0.0037(10) | 0.0020(9)   | 0.0004(8)   |
| O12  | 0.0215(15) | 0.0154(14) | 0.0124(11) | 0.0097(12) | 0.0021(10)  | -0.0028(10) |
| O13  | 0.0101(12) | 0.0208(14) | 0.0113(10) | 0.0058(11) | -0.0018(9)  | -0.0025(10) |
| O14  | 0.0088(12) | 0.0117(13) | 0.0113(10) | 0.0038(11) | -0.0008(9)  | 0.0027(9)   |

|     |            |            |            |            |             |             |
|-----|------------|------------|------------|------------|-------------|-------------|
| O21 | 0.0153(13) | 0.0085(12) | 0.0042(9)  | 0.0032(11) | 0.0029(8)   | -0.0003(8)  |
| O22 | 0.0100(13) | 0.0116(13) | 0.0109(10) | 0.0067(11) | 0.0012(9)   | 0.0013(9)   |
| O23 | 0.0162(13) | 0.0119(14) | 0.0139(11) | 0.0025(11) | 0.0056(10)  | 0.0013(9)   |
| O24 | 0.0172(14) | 0.0193(14) | 0.0127(11) | 0.0141(12) | -0.0017(10) | 0.0006(10)  |
| B1  | 0.0098(19) | 0.0114(17) | 0.0068(13) | 0.0060(17) | 0.0013(13)  | -0.0013(14) |
| O3  | 0.039(3)   | 0.030(3)   | 0.127(6)   | 0.0151(16) | 0.0075(18)  | 0.015(4)    |
| O4  | 0.040(3)   | 0.040(3)   | 0.140(6)   | 0.027(3)   | -0.0072(19) | 0.0072(19)  |

**Table S4.** Atomic coordinates, Wyckoff symbols and isotropic displacement parameters  $U_{eq}$  /  $\text{\AA}^2$  in  $\text{Ca}_{0.5}\text{Mn}(\text{H}_2\text{O})_2[\text{B}(\text{PO}_4)_2]\cdot\text{H}_2\text{O}$ . Standard deviations are given in parentheses

| Atom | Wyckoff symbol | S.O.F.     | x           | y           | z            | $U_{eq}$    |
|------|----------------|------------|-------------|-------------|--------------|-------------|
| Mn1  | 6c             |            | 0.09695(6)  | 0.54843(7)  | 0.41664(3)   | 0.01846(14) |
| Ca1A | 6c             | 0.2531(19) | 0.1057(4)   | 0.7483(4)   | 0.25694(16)  | 0.0226(4)   |
| Ca1B | 6c             | 0.2469(19) | 0.2514(4)   | 0.8943(4)   | 0.24332(16)  | 0.0226(4)   |
| P1   | 6c             |            | 0.1660(1)   | 0.3853(1)   | 0.25193(4)   | 0.01136(18) |
| P2   | 6c             |            | 0.21936(11) | 0.38528(10) | -0.08518(4)  | 0.01129(18) |
| O1   | 6c             |            | 0.2964(3)   | 0.8118(4)   | 0.38021(16)  | 0.0248(6)   |
| H11  | 6c             |            | 0.408(2)    | 0.834(6)    | 0.376(2)     | 0.0300      |
| H12  | 6c             |            | 0.264(4)    | 0.818(6)    | 0.3221(12)   | 0.0300      |
| O2   | 6c             |            | 0.2970(3)   | 0.4845(3)   | 0.45313(16)  | 0.0251(6)   |
| H21  | 6c             |            | 0.396(3)    | 0.584(3)    | 0.470(2)     | 0.0300      |
| H22  | 6c             |            | 0.325(4)    | 0.458(5)    | 0.3974(15)   | 0.0300      |
| O11  | 6c             |            | 0.1822(3)   | 0.4152(3)   | 0.15436(12)  | 0.0143(5)   |
| O12  | 6c             |            | 0.1373(3)   | 0.5139(3)   | 0.28823(14)  | 0.0204(5)   |
| O13  | 6c             |            | 0.3095(3)   | 0.3813(3)   | 0.28759(14)  | 0.0187(5)   |
| O14  | 6c             |            | 0.0191(3)   | 0.2140(3)   | 0.26672(13)  | 0.0133(4)   |
| O21  | 6c             |            | 0.2328(3)   | 0.4152(3)   | 0.01235(12)  | 0.0142(5)   |
| O22  | 6c             |            | 0.2141(3)   | 0.1950(3)   | 0.09955(13)  | 0.0132(4)   |
| O23  | 6c             |            | 0.3769(3)   | 0.5137(3)   | -0.12153(14) | 0.0210(5)   |
| O24  | 6c             |            | 0.0716(3)   | 0.3811(3)   | -0.12085(14) | 0.0186(5)   |
| B1   | 6c             |            | 0.1515(5)   | 0.3036(4)   | 0.08317(18)  | 0.0113(6)   |
| O3   | 3a             |            | 0.1450(8)   | 0           | 1/3          | 0.076(2)    |
| H31  | 6c             | 0.5        | 0.234(11)   | 0.047(13)   | 0.291(7)     | 0.0910      |
| H32  | 6c             | 0.5        | 0.152(16)   | 0.095(9)    | 0.362(8)     | 0.0910      |
| O4   | 3b             |            | 0.1449(8)   | 0.1449(8)   | 1/2          | 0.077(2)    |
| H41  | 6c             | 0.5        | 0.126(17)   | 0.096(17)   | 0.442(4)     | 0.0930      |
| H42  | 6c             | 0.5        | 0.071(14)   | 0.190(16)   | 0.501(9)     | 0.0930      |

**Table S5.** Anisotropic displacement parameters  $U_{ij}$  /  $\text{\AA}^2$  in  $\text{Ca}_{0.5}\text{Mn}(\text{H}_2\text{O})_2[\text{B}(\text{PO}_4)_2]\cdot\text{H}_2\text{O}$ . Standard deviations are given in parentheses

| Atom | $U_{11}$   | $U_{22}$   | $U_{33}$   | $U_{12}$   | $U_{13}$    | $U_{23}$     |
|------|------------|------------|------------|------------|-------------|--------------|
| Mn1  | 0.0146(2)  | 0.0198(3)  | 0.0192(2)  | 0.0074(2)  | 0.00001(19) | -0.00973(19) |
| Ca1A | 0.0270(12) | 0.0268(12) | 0.0149(7)  | 0.0141(9)  | 0.0011(7)   | 0.0009(7)    |
| Ca1B | 0.0270(12) | 0.0268(12) | 0.0149(7)  | 0.0141(9)  | 0.0011(7)   | 0.0009(7)    |
| P1   | 0.0129(4)  | 0.0118(4)  | 0.0071(3)  | 0.0044(3)  | 0.0010(2)   | -0.0011(2)   |
| P2   | 0.0155(4)  | 0.0111(4)  | 0.0073(3)  | 0.0067(3)  | 0.0021(3)   | 0.0012(2)    |
| O1   | 0.0218(14) | 0.0296(15) | 0.0233(11) | 0.0130(12) | 0.0003(10)  | -0.0069(11)  |

|     |            |            |            |            |             |             |
|-----|------------|------------|------------|------------|-------------|-------------|
| O2  | 0.0214(13) | 0.0249(15) | 0.0250(11) | 0.0086(12) | -0.0016(10) | -0.0087(11) |
| O11 | 0.0194(12) | 0.0120(11) | 0.0083(8)  | 0.0054(10) | 0.0016(8)   | 0.0004(7)   |
| O12 | 0.0298(15) | 0.0177(13) | 0.0140(9)  | 0.0121(12) | 0.0042(10)  | -0.0023(9)  |
| O13 | 0.0125(11) | 0.0234(13) | 0.0142(9)  | 0.0046(10) | -0.0033(8)  | -0.0015(9)  |
| O14 | 0.0120(11) | 0.0136(11) | 0.0126(9)  | 0.0051(9)  | -0.0010(8)  | 0.0023(8)   |
| O21 | 0.0202(13) | 0.0117(10) | 0.0075(8)  | 0.0056(10) | 0.0017(8)   | 0.0004(7)   |
| O22 | 0.0134(11) | 0.0150(12) | 0.0136(9)  | 0.0089(10) | 0.0030(8)   | 0.0030(8)   |
| O23 | 0.0228(13) | 0.0167(13) | 0.0155(10) | 0.0038(11) | 0.0073(9)   | 0.0025(9)   |
| O24 | 0.0247(14) | 0.0237(13) | 0.0153(10) | 0.0180(11) | -0.0008(9)  | 0.0020(9)   |
| B1  | 0.0138(17) | 0.0123(14) | 0.0078(11) | 0.0066(14) | 0.0013(11)  | 0.0002(11)  |
| O3  | 0.044(3)   | 0.042(3)   | 0.141(7)   | 0.0208(17) | 0.006(2)    | 0.012(4)    |
| O4  | 0.047(3)   | 0.047(3)   | 0.144(7)   | 0.028(3)   | -0.003(2)   | 0.003(2)    |

**Table S6.** Atomic coordinates, Wyckoff symbols and isotropic displacement parameters  $U_{eq} / \text{\AA}^2$  in  $\text{Ca}_{0.5}\text{Co}(\text{H}_2\text{O})_2[\text{B}(\text{PO}_4)_2] \cdot \text{H}_2\text{O}$ . Standard deviations are given in parentheses

| Atom | Wyckoff symbol | S.O.F.     | x           | y           | z            | $U_{eq}$    |
|------|----------------|------------|-------------|-------------|--------------|-------------|
| Co1  | 6c             |            | 0.10143(5)  | 0.55074(6)  | 0.41671(3)   | 0.01193(12) |
| Ca1A | 6c             | 0.2506(19) | 0.1127(5)   | 0.7533(5)   | 0.2563(2)    | 0.0231(5)   |
| Ca1B | 6c             | 0.2494(19) | 0.2463(5)   | 0.8867(5)   | 0.2436(2)    | 0.0231(5)   |
| P1   | 6c             |            | 0.16936(11) | 0.38870(11) | 0.25301(5)   | 0.0084(2)   |
| P2   | 6c             |            | 0.21926(12) | 0.38871(11) | -0.08630(5)  | 0.0084(2)   |
| O1   | 6c             |            | 0.2906(3)   | 0.8087(4)   | 0.38209(17)  | 0.0219(6)   |
| H11  | 6c             |            | 0.407(2)    | 0.837(5)    | 0.379(2)     | 0.0260      |
| H12  | 6c             |            | 0.264(4)    | 0.821(5)    | 0.3219(12)   | 0.0260      |
| O2   | 6c             |            | 0.2911(3)   | 0.4825(4)   | 0.45159(17)  | 0.0217(6)   |
| H21  | 6c             |            | 0.391(3)    | 0.573(3)    | 0.4774(19)   | 0.0260      |
| H22  | 6c             |            | 0.327(4)    | 0.457(5)    | 0.3983(15)   | 0.0260      |
| O11  | 6c             |            | 0.1829(3)   | 0.4201(3)   | 0.15501(13)  | 0.0096(5)   |
| O12  | 6c             |            | 0.1413(3)   | 0.5191(3)   | 0.29116(14)  | 0.0159(6)   |
| O13  | 6c             |            | 0.3152(3)   | 0.3829(3)   | 0.28719(15)  | 0.0136(5)   |
| O14  | 6c             |            | 0.0198(3)   | 0.2155(3)   | 0.26771(15)  | 0.0096(5)   |
| O21  | 6c             |            | 0.2366(3)   | 0.4194(3)   | 0.01190(13)  | 0.0103(5)   |
| O22  | 6c             |            | 0.2158(3)   | 0.1962(3)   | 0.10063(15)  | 0.0098(5)   |
| O23  | 6c             |            | 0.3779(3)   | 0.5188(3)   | -0.12476(14) | 0.0156(6)   |
| O24  | 6c             |            | 0.0678(3)   | 0.3829(3)   | -0.12045(15) | 0.0137(6)   |
| B1   | 6c             |            | 0.1534(5)   | 0.3059(4)   | 0.0834(2)    | 0.0093(7)   |
| O3   | 3a             |            | 0.1427(7)   | 0           | 1/3          | 0.078(2)    |
| H31  | 6c             | 0.5        | 0.225(12)   | 0.052(11)   | 0.287(5)     | 0.0930      |
| H32  | 6c             | 0.5        | 0.157(14)   | 0.095(8)    | 0.368(6)     | 0.0930      |
| O4   | 3b             |            | 0.1424(7)   | 0.1424(7)   | 1/2          | 0.082(2)    |
| H41  | 6c             | 0.5        | 0.121(16)   | 0.086(14)   | 0.444(4)     | 0.0980      |
| H42  | 6c             | 0.5        | 0.095(13)   | 0.215(11)   | 0.492(8)     | 0.0980      |

**Table S7.** Anisotropic displacement parameters  $U_{ij} / \text{\AA}^2$  in  $\text{Ca}_{0.5}\text{Co}(\text{H}_2\text{O})_2[\text{B}(\text{PO}_4)_2] \cdot \text{H}_2\text{O}$ . Standard deviations are given in parentheses

| Atom | $U_{11}$ | $U_{22}$ | $U_{33}$ | $U_{12}$ | $U_{13}$ | $U_{23}$ |
|------|----------|----------|----------|----------|----------|----------|
|------|----------|----------|----------|----------|----------|----------|

|      |            |            |            |            |             |              |
|------|------------|------------|------------|------------|-------------|--------------|
| Co1  | 0.0109(2)  | 0.0125(3)  | 0.0118(2)  | 0.0054(2)  | 0.0000(2)   | -0.00409(19) |
| Ca1A | 0.0285(14) | 0.0295(14) | 0.0131(10) | 0.0158(10) | -0.001(1)   | -0.0006(10)  |
| Ca1B | 0.0285(14) | 0.0295(14) | 0.0131(10) | 0.0158(10) | -0.001(1)   | -0.0006(10)  |
| P1   | 0.0079(4)  | 0.0085(4)  | 0.0067(4)  | 0.0026(4)  | 0.0014(3)   | -0.0011(3)   |
| P2   | 0.0107(5)  | 0.0086(4)  | 0.0066(4)  | 0.0055(4)  | 0.0025(3)   | 0.0013(3)    |
| O1   | 0.0154(14) | 0.0252(15) | 0.0235(15) | 0.0089(13) | -0.0005(12) | -0.0070(13)  |
| O2   | 0.0171(14) | 0.0236(16) | 0.0219(15) | 0.0082(12) | -0.0012(12) | -0.0096(13)  |
| O11  | 0.0121(13) | 0.0085(11) | 0.006(1)   | 0.0036(10) | 0.0021(9)   | 0.0007(9)    |
| O12  | 0.0219(15) | 0.0148(13) | 0.0118(13) | 0.0098(12) | 0.0038(11)  | -0.0025(11)  |
| O13  | 0.0087(12) | 0.0182(14) | 0.0114(13) | 0.0048(11) | -0.0012(10) | -0.0011(11)  |
| O14  | 0.0066(11) | 0.0106(13) | 0.0105(12) | 0.0035(10) | -0.0011(9)  | 0.0027(9)    |
| O21  | 0.0143(13) | 0.0082(11) | 0.0066(10) | 0.0043(10) | 0.0017(9)   | -0.0007(9)   |
| O22  | 0.0101(13) | 0.0106(13) | 0.0109(12) | 0.0069(11) | 0.0015(10)  | 0.0028(10)   |
| O23  | 0.0166(13) | 0.0120(13) | 0.0123(13) | 0.0029(11) | 0.0067(10)  | 0.0025(11)   |
| O24  | 0.0184(14) | 0.0211(14) | 0.0095(13) | 0.0158(12) | 0.001(1)    | 0.0020(11)   |
| B1   | 0.012(2)   | 0.0101(16) | 0.0063(17) | 0.0055(18) | 0.0011(16)  | -0.0005(14)  |
| O3   | 0.044(3)   | 0.044(4)   | 0.144(7)   | 0.0221(19) | 0.006(2)    | 0.011(4)     |
| O4   | 0.043(3)   | 0.043(3)   | 0.164(7)   | 0.026(3)   | -0.001(2)   | 0.001(2)     |

**Table S8.** Atomic coordinates, Wyckoff symbols and isotropic displacement parameters  $U_{eq}$  / Å<sup>2</sup> in Ca<sub>0.5</sub>Zn(H<sub>2</sub>O)<sub>2</sub>[B(PO<sub>4</sub>)<sub>2</sub>]·H<sub>2</sub>O. Standard deviations are given in parentheses

| Atom | Wyckoff symbol | S.O.F.   | x           | y           | z            | $U_{eq}$    |
|------|----------------|----------|-------------|-------------|--------------|-------------|
| Zn1  | 6c             |          | 0.09034(5)  | 0.54517(6)  | 0.41667(3)   | 0.01535(11) |
| Ca1A | 6c             | 0.249(2) | 0.1140(5)   | 0.7555(5)   | 0.2549(2)    | 0.0282(4)   |
| Ca1B | 6c             | 0.251(2) | 0.2443(5)   | 0.8855(5)   | 0.2449(2)    | 0.0282(4)   |
| P1   | 6c             |          | 0.16742(10) | 0.3886(1)   | 0.25377(5)   | 0.00975(16) |
| P2   | 6c             |          | 0.22105(11) | 0.38859(10) | -0.08713(5)  | 0.00987(16) |
| O1   | 6c             |          | 0.2897(4)   | 0.8089(4)   | 0.3807(2)    | 0.0286(7)   |
| H11  | 6c             |          | 0.398(4)    | 0.820(7)    | 0.373(3)     | 0.0340      |
| H12  | 6c             |          | 0.281(6)    | 0.827(8)    | 0.4422(13)   | 0.0340      |
| O2   | 6c             |          | 0.2900(4)   | 0.4814(4)   | 0.4527(2)    | 0.0290(7)   |
| H21  | 6c             |          | 0.389(4)    | 0.564(6)    | 0.483(3)     | 0.0350      |
| H22  | 6c             |          | 0.330(6)    | 0.448(7)    | 0.403(2)     | 0.0350      |
| O11  | 6c             |          | 0.1821(3)   | 0.4203(3)   | 0.15508(14)  | 0.0116(4)   |
| O12  | 6c             |          | 0.1392(4)   | 0.5182(3)   | 0.29265(17)  | 0.0190(5)   |
| O13  | 6c             |          | 0.3131(3)   | 0.3825(3)   | 0.28785(16)  | 0.0170(5)   |
| O14  | 6c             |          | 0.0182(3)   | 0.2161(3)   | 0.26833(16)  | 0.0121(4)   |
| O21  | 6c             |          | 0.2383(3)   | 0.4203(3)   | 0.01157(14)  | 0.0116(4)   |
| O22  | 6c             |          | 0.2160(3)   | 0.1979(3)   | 0.10174(16)  | 0.0120(4)   |
| O23  | 6c             |          | 0.3789(3)   | 0.5184(3)   | -0.12614(17) | 0.0195(5)   |
| O24  | 6c             |          | 0.0695(3)   | 0.3825(3)   | -0.12128(16) | 0.0171(5)   |
| B1   | 6c             |          | 0.1542(5)   | 0.3082(4)   | 0.0834(2)    | 0.0099(6)   |
| O3   | 3a             |          | 0.1371(11)  | 0           | 1/3          | 0.116(5)    |
| H31  | 6c             | 0.5      | 0.244(14)   | 0.07(2)     | 0.305(13)    | 0.1390      |
| H32  | 6c             | 0.5      | 0.14(3)     | 0.07(2)     | 0.383(12)    | 0.1390      |
| O4   | 3b             |          | 0.1366(11)  | 0.1366(11)  | 1/2          | 0.105(4)    |
| H41  | 6c             | 0.5      | 0.14(3)     | 0.070(19)   | 0.453(10)    | 0.1260      |

|     |    |     |         |           |           |        |
|-----|----|-----|---------|-----------|-----------|--------|
| H42 | 6c | 0.5 | 0.18(3) | 0.245(10) | 0.474(11) | 0.1260 |
|-----|----|-----|---------|-----------|-----------|--------|

**Table S9.** Anisotropic displacement parameters  $U_{ij} / \text{\AA}^2$  in  $\text{Ca}_{0.5}\text{Zn}(\text{H}_2\text{O})_2[\text{B}(\text{PO}_4)_2] \cdot \text{H}_2\text{O}$ . Standard deviations are given in parentheses

| Atom | $U_{11}$    | $U_{22}$   | $U_{33}$    | $U_{12}$    | $U_{13}$    | $U_{23}$     |
|------|-------------|------------|-------------|-------------|-------------|--------------|
| Zn1  | 0.01366(18) | 0.0177(2)  | 0.01330(17) | 0.00682(17) | 0.00007(14) | -0.00626(14) |
| Ca1A | 0.0346(13)  | 0.0360(14) | 0.0151(8)   | 0.0183(10)  | -0.0015(9)  | -0.0018(9)   |
| Ca1B | 0.0346(13)  | 0.0360(14) | 0.0151(8)   | 0.0183(10)  | -0.0015(9)  | -0.0018(9)   |
| P1   | 0.0090(3)   | 0.0088(3)  | 0.0092(3)   | 0.0028(3)   | 0.0023(2)   | -0.0016(3)   |
| P2   | 0.0125(4)   | 0.0089(3)  | 0.0093(3)   | 0.0062(3)   | 0.0038(3)   | 0.0016(3)    |
| O1   | 0.0223(15)  | 0.0339(17) | 0.0279(15)  | 0.0128(13)  | 0.0001(12)  | -0.0126(13)  |
| O2   | 0.0232(15)  | 0.0306(17) | 0.0288(15)  | 0.0102(13)  | 0.0000(12)  | -0.0123(13)  |
| O11  | 0.0146(11)  | 0.0105(10) | 0.0083(9)   | 0.0052(9)   | 0.0030(8)   | -0.0002(8)   |
| O12  | 0.0283(15)  | 0.0126(11) | 0.0164(11)  | 0.0104(11)  | 0.0086(10)  | -0.0015(9)   |
| O13  | 0.0102(11)  | 0.0236(13) | 0.013(1)    | 0.0055(10)  | -0.0005(8)  | -0.0014(10)  |
| O14  | 0.0084(10)  | 0.0107(11) | 0.015(1)    | 0.0033(9)   | -0.0010(8)  | 0.0026(8)    |
| O21  | 0.0145(11)  | 0.0104(10) | 0.0089(9)   | 0.0054(9)   | 0.0029(8)   | 0.0001(8)    |
| O22  | 0.0110(11)  | 0.0123(11) | 0.0146(10)  | 0.0072(9)   | 0.0026(8)   | 0.0031(9)    |
| O23  | 0.0199(12)  | 0.0136(12) | 0.0171(12)  | 0.0024(10)  | 0.0105(9)   | 0.0018(9)    |
| O24  | 0.0222(13)  | 0.0233(13) | 0.0143(11)  | 0.0178(11)  | 0.0009(10)  | 0.0016(10)   |
| B1   | 0.0104(15)  | 0.0096(12) | 0.0092(13)  | 0.0046(13)  | 0.0022(11)  | -0.0002(11)  |
| O3   | 0.049(4)    | 0.049(5)   | 0.249(17)   | 0.025(2)    | 0.015(4)    | 0.031(7)     |
| O4   | 0.049(3)    | 0.049(3)   | 0.214(13)   | 0.023(4)    | -0.014(3)   | 0.014(3)     |

**Table S10.** Atomic coordinates, Wyckoff symbols and isotropic displacement parameters  $U_{\text{eq}} / \text{\AA}^2$  in  $\text{Ca}_{0.5}\text{Cd}(\text{H}_2\text{O})_2[\text{B}(\text{PO}_4)_2] \cdot \text{H}_2\text{O}$ . Standard deviations are given in parentheses

| Atom | Wyckoff symbol | S.O.F.   | $x$         | $y$         | $z$         | $U_{\text{eq}}$ |
|------|----------------|----------|-------------|-------------|-------------|-----------------|
| Cd1  | 6c             |          | 0.09587(4)  | 0.54798(5)  | 0.41657(3)  | 0.02635(14)     |
| Ca1A | 6c             | 0.249(2) | 0.1000(6)   | 0.7448(6)   | 0.2583(3)   | 0.0206(7)       |
| Ca1B | 6c             | 0.251(2) | 0.2550(6)   | 0.8999(6)   | 0.2426(3)   | 0.0206(7)       |
| P1   | 6c             |          | 0.16238(17) | 0.38393(16) | 0.25088(8)  | 0.0127(3)       |
| P2   | 6c             |          | 0.22099(18) | 0.38400(16) | -0.08398(8) | 0.0133(3)       |
| O1   | 6c             |          | 0.2999(4)   | 0.8164(5)   | 0.3770(2)   | 0.0257(9)       |
| H11  | 6c             |          | 0.240(4)    | 0.784(6)    | 0.3242(17)  | 0.0310          |
| H12  | 6c             |          | 0.405(3)    | 0.831(6)    | 0.363(3)    | 0.0310          |
| O2   | 6c             |          | 0.2993(4)   | 0.4832(5)   | 0.4561(2)   | 0.0265(10)      |
| H21  | 6c             |          | 0.399(3)    | 0.579(4)    | 0.473(2)    | 0.0320          |
| H22  | 6c             |          | 0.316(5)    | 0.470(6)    | 0.3959(12)  | 0.0320          |
| O11  | 6c             |          | 0.1855(4)   | 0.4141(4)   | 0.15431(19) | 0.0162(8)       |
| O12  | 6c             |          | 0.1310(5)   | 0.5109(4)   | 0.2841(2)   | 0.0239(9)       |
| O13  | 6c             |          | 0.3005(4)   | 0.3812(4)   | 0.2913(2)   | 0.0214(9)       |
| O14  | 6c             |          | 0.0173(4)   | 0.2139(4)   | 0.2647(2)   | 0.0137(8)       |
| O21  | 6c             |          | 0.2280(4)   | 0.4139(4)   | 0.01212(19) | 0.0168(8)       |
| O22  | 6c             |          | 0.2147(4)   | 0.1973(4)   | 0.0972(2)   | 0.0126(8)       |
| O23  | 6c             |          | 0.3798(4)   | 0.5109(4)   | -0.1163(2)  | 0.0250(9)       |
| O24  | 6c             |          | 0.0800(4)   | 0.3809(4)   | -0.1233(2)  | 0.0226(9)       |
| B1   | 6c             |          | 0.1518(8)   | 0.3040(6)   | 0.0824(3)   | 0.0126(12)      |

|     |    |     |           |           |           |          |
|-----|----|-----|-----------|-----------|-----------|----------|
| O3  | 3a |     | 0.1448(7) | 0         | 1/3       | 0.076(3) |
| H31 | 6c | 0.5 | 0.251(6)  | 0.074(13) | 0.309(9)  | 0.0910   |
| H32 | 6c | 0.5 | 0.078(10) | 0.046(14) | 0.317(10) | 0.0910   |
| O4  | 3b |     | 0.1457(9) | 0.1457(9) | 1/2       | 0.085(3) |
| H41 | 6c | 0.5 | 0.067(14) | 0.14(2)   | 0.459(8)  | 0.1020   |
| H42 | 6c | 0.5 | 0.097(16) | 0.14(2)   | 0.556(5)  | 0.1020   |

**Table S11.** Anisotropic displacement parameters  $U_{ij} / \text{\AA}^2$  in  $\text{Ca}_{0.5}\text{Cd}(\text{H}_2\text{O})_2[\text{B}(\text{PO}_4)_2] \cdot \text{H}_2\text{O}$ . Standard deviations are given in parentheses

| Atom | $U_{11}$   | $U_{22}$   | $U_{33}$   | $U_{12}$   | $U_{13}$    | $U_{23}$    |
|------|------------|------------|------------|------------|-------------|-------------|
| Cd1  | 0.0209(2)  | 0.0298(3)  | 0.0254(2)  | 0.0105(2)  | 0.0002(2)   | -0.0169(2)  |
| Ca1A | 0.027(2)   | 0.024(2)   | 0.0120(17) | 0.0131(14) | 0.0027(15)  | 0.0009(15)  |
| Ca1B | 0.027(2)   | 0.024(2)   | 0.0120(17) | 0.0131(14) | 0.0027(15)  | 0.0009(15)  |
| P1   | 0.0186(8)  | 0.0107(7)  | 0.0069(7)  | 0.0059(6)  | 0.0012(6)   | -0.0017(5)  |
| P2   | 0.0197(9)  | 0.0096(7)  | 0.0074(7)  | 0.0050(6)  | 0.0024(6)   | 0.0013(5)   |
| O1   | 0.021(2)   | 0.030(2)   | 0.026(2)   | 0.013(2)   | 0.0004(18)  | -0.007(2)   |
| O2   | 0.023(2)   | 0.024(2)   | 0.025(2)   | 0.0060(19) | -0.0023(18) | -0.005(2)   |
| O11  | 0.027(2)   | 0.0089(17) | 0.0076(17) | 0.0055(17) | 0.0009(16)  | 0.0009(14)  |
| O12  | 0.040(2)   | 0.018(2)   | 0.014(2)   | 0.0143(19) | 0.002(2)    | -0.0051(19) |
| O13  | 0.017(2)   | 0.029(2)   | 0.011(2)   | 0.0057(17) | -0.0060(17) | 0.0002(18)  |
| O14  | 0.017(2)   | 0.0126(19) | 0.011(2)   | 0.0070(16) | -0.0024(15) | 0.0003(16)  |
| O21  | 0.029(2)   | 0.0111(17) | 0.0061(17) | 0.0066(16) | 0.0034(16)  | 0.0007(15)  |
| O22  | 0.0104(19) | 0.0101(19) | 0.014(2)   | 0.0031(17) | -0.0012(16) | 0.0018(15)  |
| O23  | 0.028(2)   | 0.015(2)   | 0.018(2)   | 0.0000(18) | 0.0088(17)  | 0.0033(19)  |
| O24  | 0.033(2)   | 0.027(2)   | 0.017(2)   | 0.0223(19) | -0.0015(18) | -0.0006(18) |
| B1   | 0.021(4)   | 0.012(3)   | 0.003(3)   | 0.008(3)   | 0.001(3)    | 0.000(2)    |
| O3   | 0.044(3)   | 0.054(5)   | 0.134(9)   | 0.027(3)   | 0.011(3)    | 0.023(5)    |
| O4   | 0.053(4)   | 0.053(4)   | 0.157(9)   | 0.031(4)   | -0.011(3)   | 0.011(3)    |

## Crystal Images

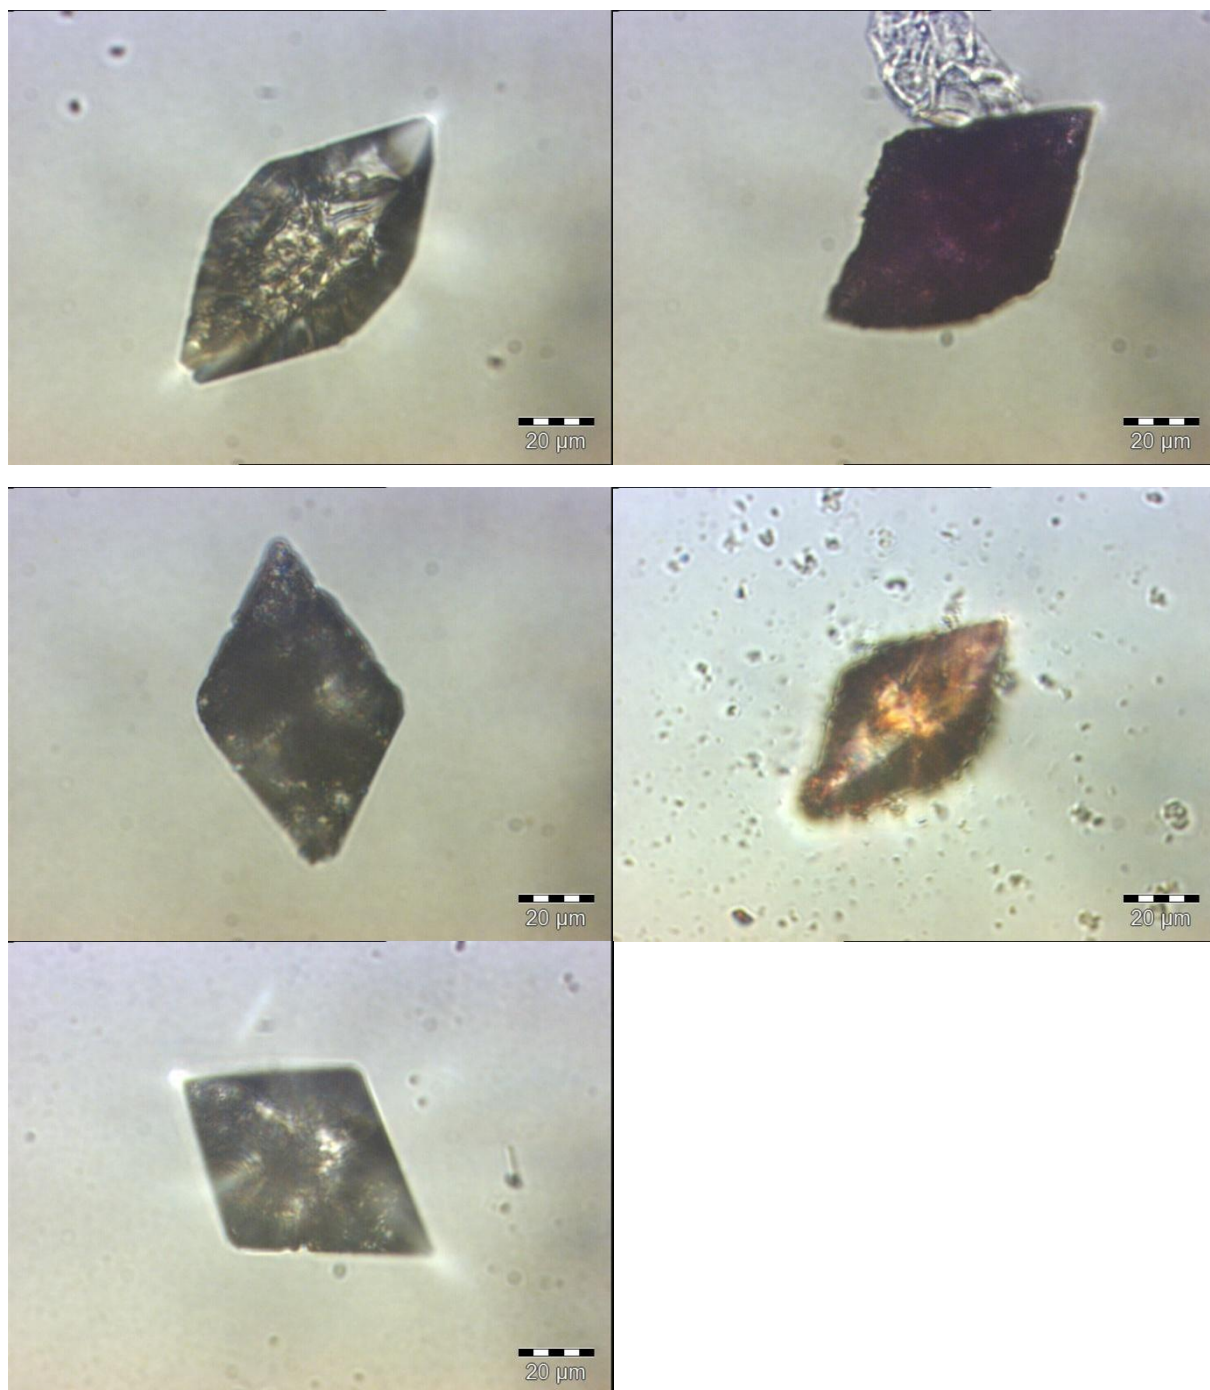

**Figure S2.** Microscope pictures of respective crystals of  $\text{Ca}_{0.5}\text{M}(\text{H}_2\text{O})_2[\text{B}(\text{PO}_4)_2]\cdot\text{H}_2\text{O}$ . Order in reading direction M = Cd, Co, Zn, Mn, Mg.

## UV-Vis Spectra and Tanabe-Sugano Analysis

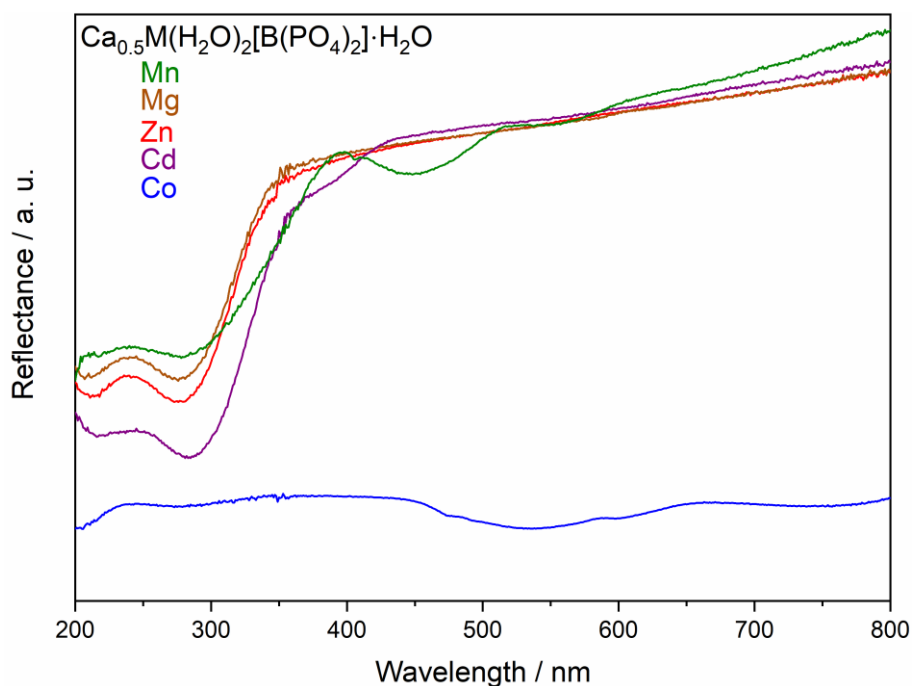

**Figure S3.** UV-vis spectra of  $\text{Ca}_{0.5}\text{M}(\text{H}_2\text{O})_2[\text{B}(\text{PO}_4)_2]\cdot\text{H}_2\text{O}$  ( $\text{M} = \text{Mg}, \text{Mn}, \text{Co}, \text{Zn}, \text{Cd}$ ).

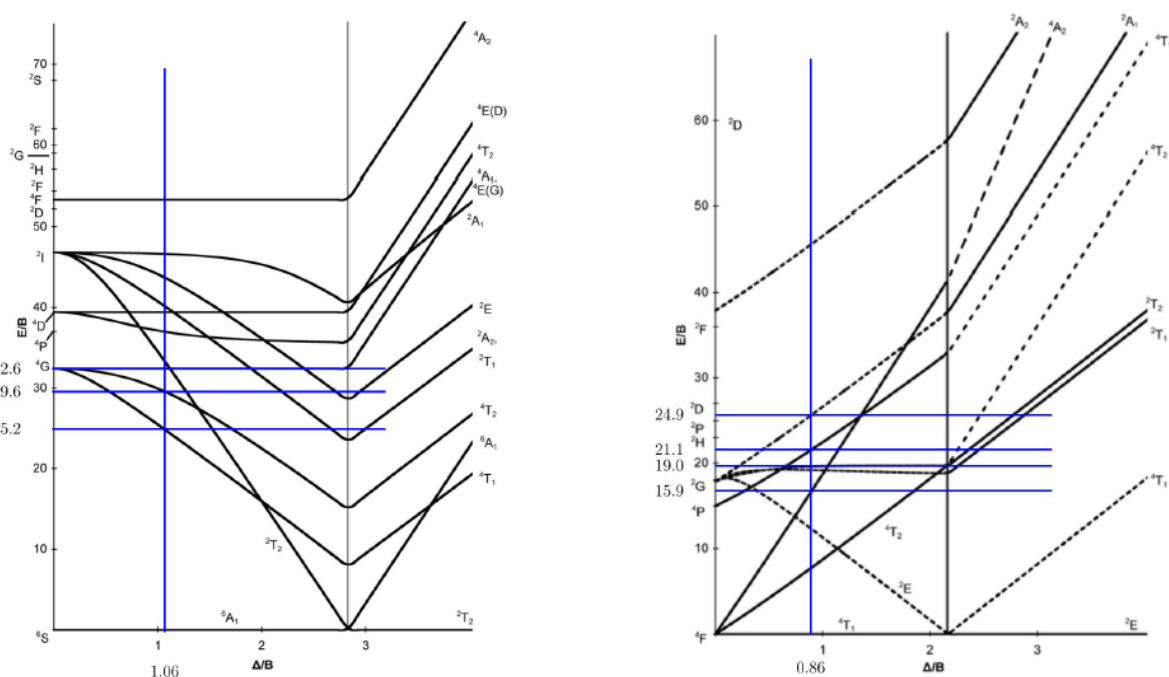

**Figure S4.** Tanabe-Sugano diagrams for  $\text{Mn}^{2+}$  (electronic configuration  $d^5$ ) and  $\text{Co}^{2+}$  (electronic configuration  $d^7$ ). Diagrams were taken and edited after [1,2].

**Table S12.** The assignment of the excited states to the respective wavelengths, the estimated energies  $E$ , the Racah parameter  $B$ , and the ligand field splitting  $\Delta$  and for  $\text{M} = \text{Mn}$ . Standard deviations of  $\lambda$  were estimated from the fit data within the program OriginLab<sup>[3]</sup>, following deviations were estimated by the partial derivatives

| $\text{Mn}^{2+} (d^5)$ | $\lambda / \text{nm}$ | $E / \text{cm}^{-1}$ | $E/B$ | $B / \text{cm}^{-1}$ |
|------------------------|-----------------------|----------------------|-------|----------------------|
|------------------------|-----------------------|----------------------|-------|----------------------|

|                        |          |           |         |                                    |
|------------------------|----------|-----------|---------|------------------------------------|
| ${}^4A_1(G), {}^4E(G)$ | 407.9(7) | 24515(42) | 32.6(1) | 752(4)                             |
| ${}^4T_2(G)$           | 451.4(4) | 22153(20) | 29.6(1) | 748(4)                             |
| ${}^4T_1(G)$           | 536.2(9) | 18469(47) | 25.2(1) | 733(6)                             |
|                        |          |           |         | $\bar{B} = 744(5) \text{ cm}^{-1}$ |
|                        |          |           |         | $\Delta = 789(13) \text{ cm}^{-1}$ |

**Table S13.** The assignment of the excited states to the respective wavelengths, the estimated energies  $E$ , the Racah parameter  $B$ , and the ligand field splitting  $\Delta$  and for  $M = \text{Co}$ . Standard deviations of  $\lambda$  were estimated from the fit data within the program OriginLab<sup>[3]</sup>, following deviations were estimated by the partial derivatives

| $\text{Co}^{2+} (d^7)$ | $\lambda / \text{nm}$ | $E / \text{cm}^{-1}$ | $E/B$   | $B / \text{cm}^{-1}$               |
|------------------------|-----------------------|----------------------|---------|------------------------------------|
| ${}^2A_1(G)$           | 474.8(5)              | 20958(22)            | 24.9(1) | 842(4)                             |
| ${}^4T_1(P)$           | 533.3(2)              | 18752(7)             | 21.1(1) | 889(5)                             |
| ${}^2T_2(G)$           | 612.3(9)              | 16332(24)            | 19.0(1) | 858(6)                             |
| ${}^4A_2(F)$           | 734.1(9)              | 13622(17)            | 15.9(1) | 856(6)                             |
|                        |                       |                      |         | $\bar{B} = 861(5) \text{ cm}^{-1}$ |
|                        |                       |                      |         | $\Delta = 712(13) \text{ cm}^{-1}$ |

## Thermal Analysis

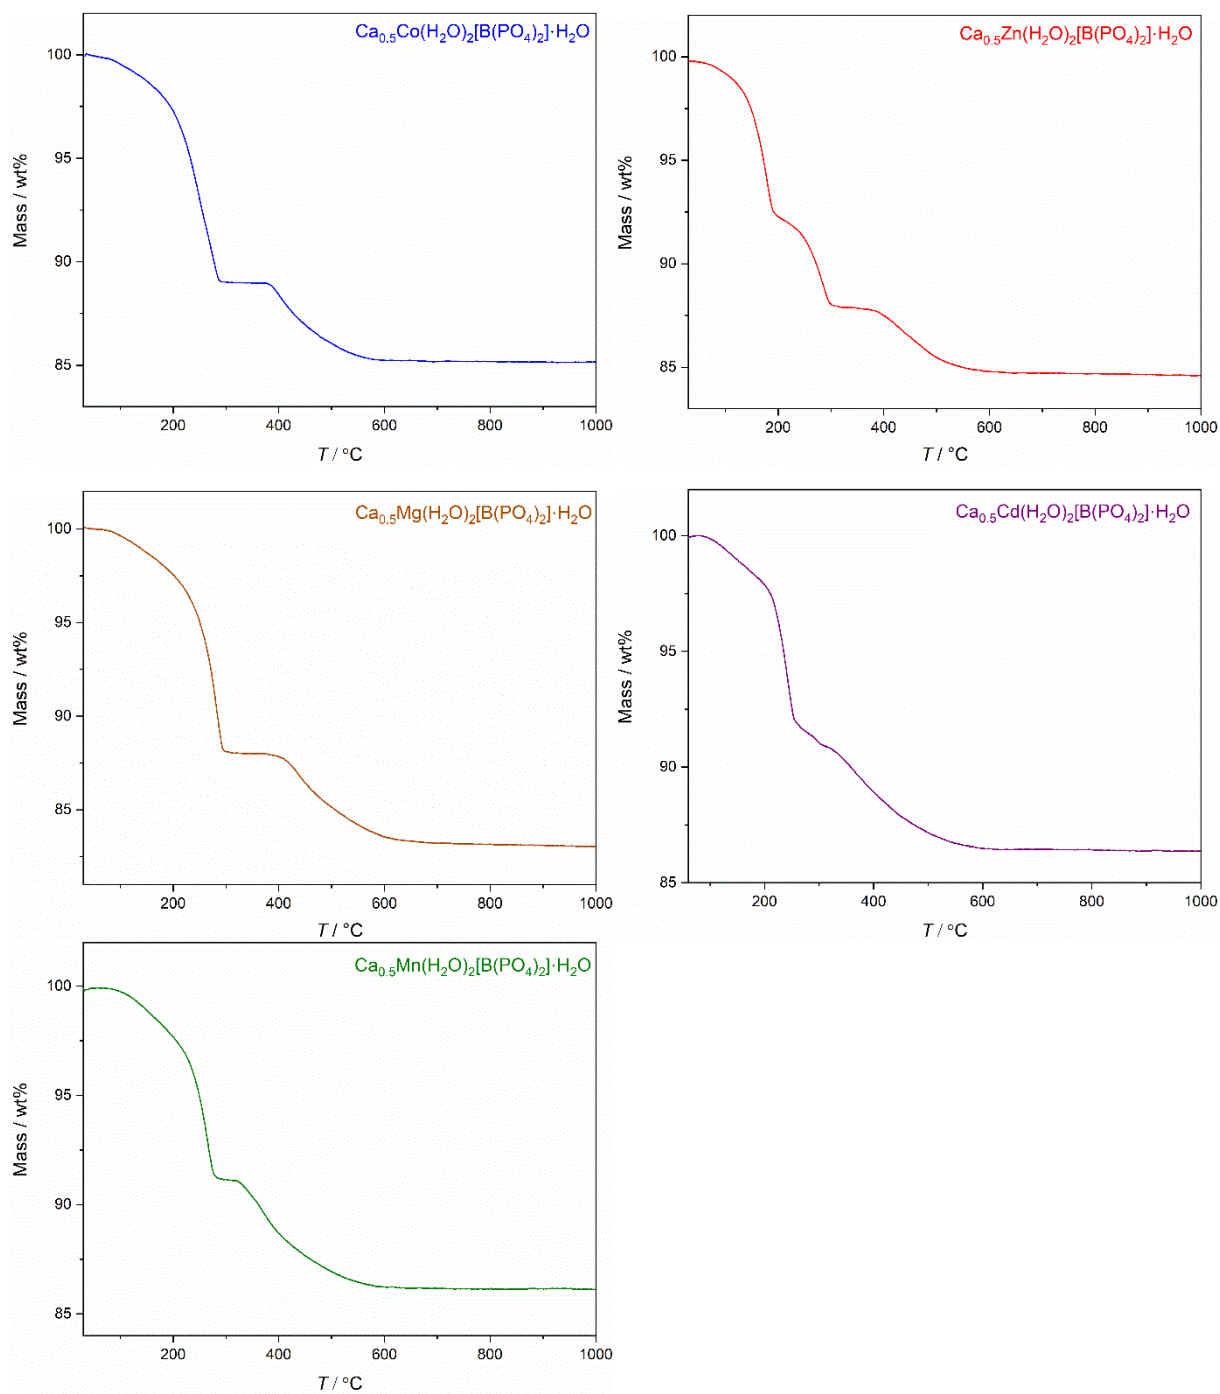

**Figure S5.** Thermogravimetric analysis of  $\text{Ca}_{0.5}\text{M}(\text{H}_2\text{O})_2[\text{B}(\text{PO}_4)_2]\cdot\text{H}_2\text{O}$  (M = Co, Zn, Mg, Cd, Mn).

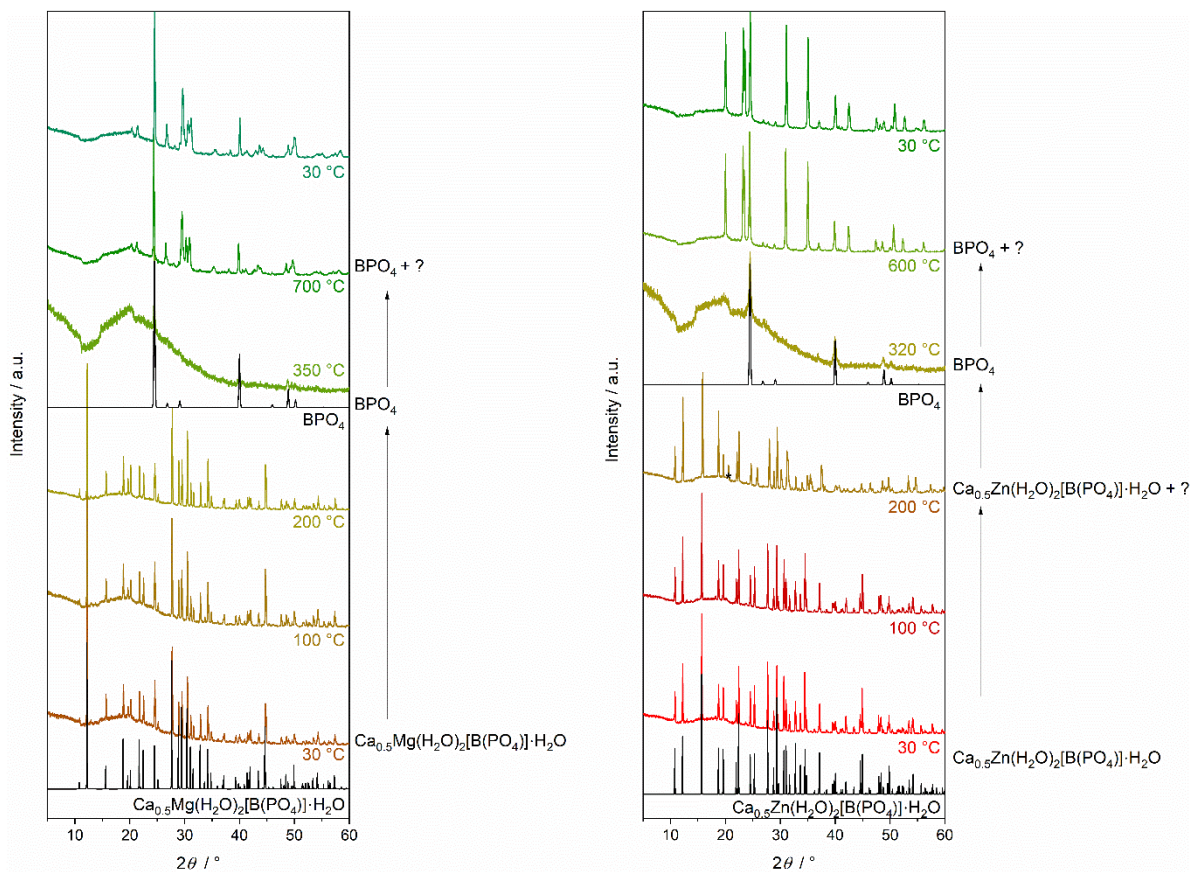

**Figure S6.** Varied Temperature Powder X-ray Diffraction (VT-PXRD) of  $\text{Ca}_{0.5}\text{M}(\text{H}_2\text{O})_2[\text{B}(\text{PO}_4)_2]\cdot\text{H}_2\text{O}$  ( $\text{M} = \text{Zn}, \text{Mg}$ ).

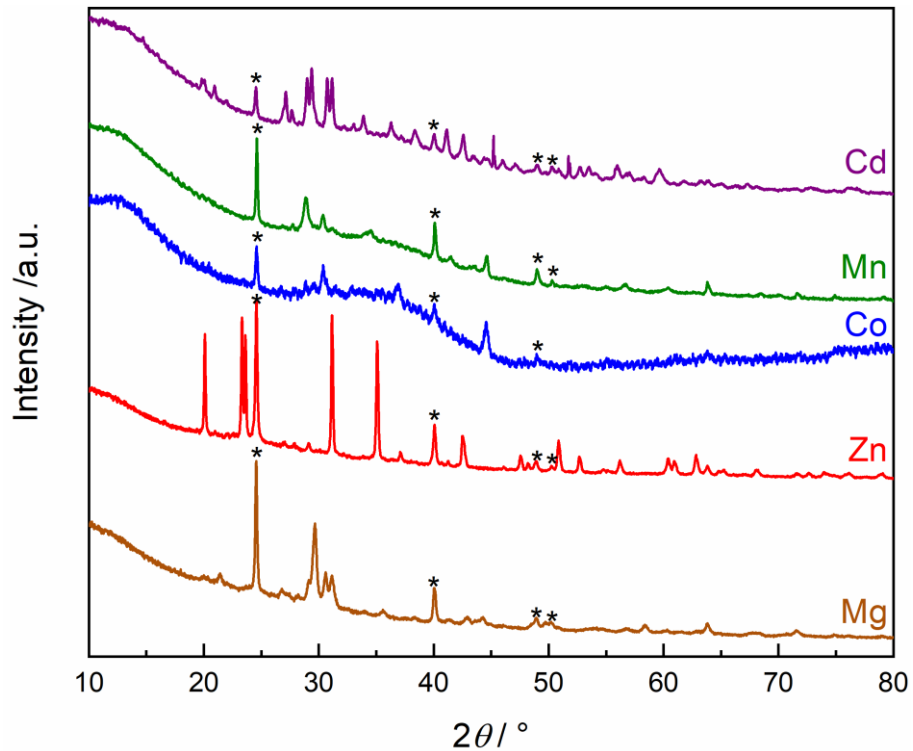

**Figure S7.** Powder X-ray diffraction patterns after thermogravimetric analysis of  $\text{Ca}_{0.5}\text{M}(\text{H}_2\text{O})_2[\text{B}(\text{PO}_4)_2]\cdot\text{H}_2\text{O}$  for  $\text{M} = \text{Mg}$  (700 °C),  $\text{M} = \text{Zn}$  (600 °C),  $\text{M} = \text{Co}, \text{Mn}, \text{Cd}$  (620 °C). Asterisks mark the  $\text{BPO}_4$  phase.

# Energy Dispersive X-ray Spectroscopy

## $\text{Ca}_{0.5}\text{Mg}(\text{H}_2\text{O})_2[\text{B}(\text{PO}_4)_2]\cdot\text{H}_2\text{O}$

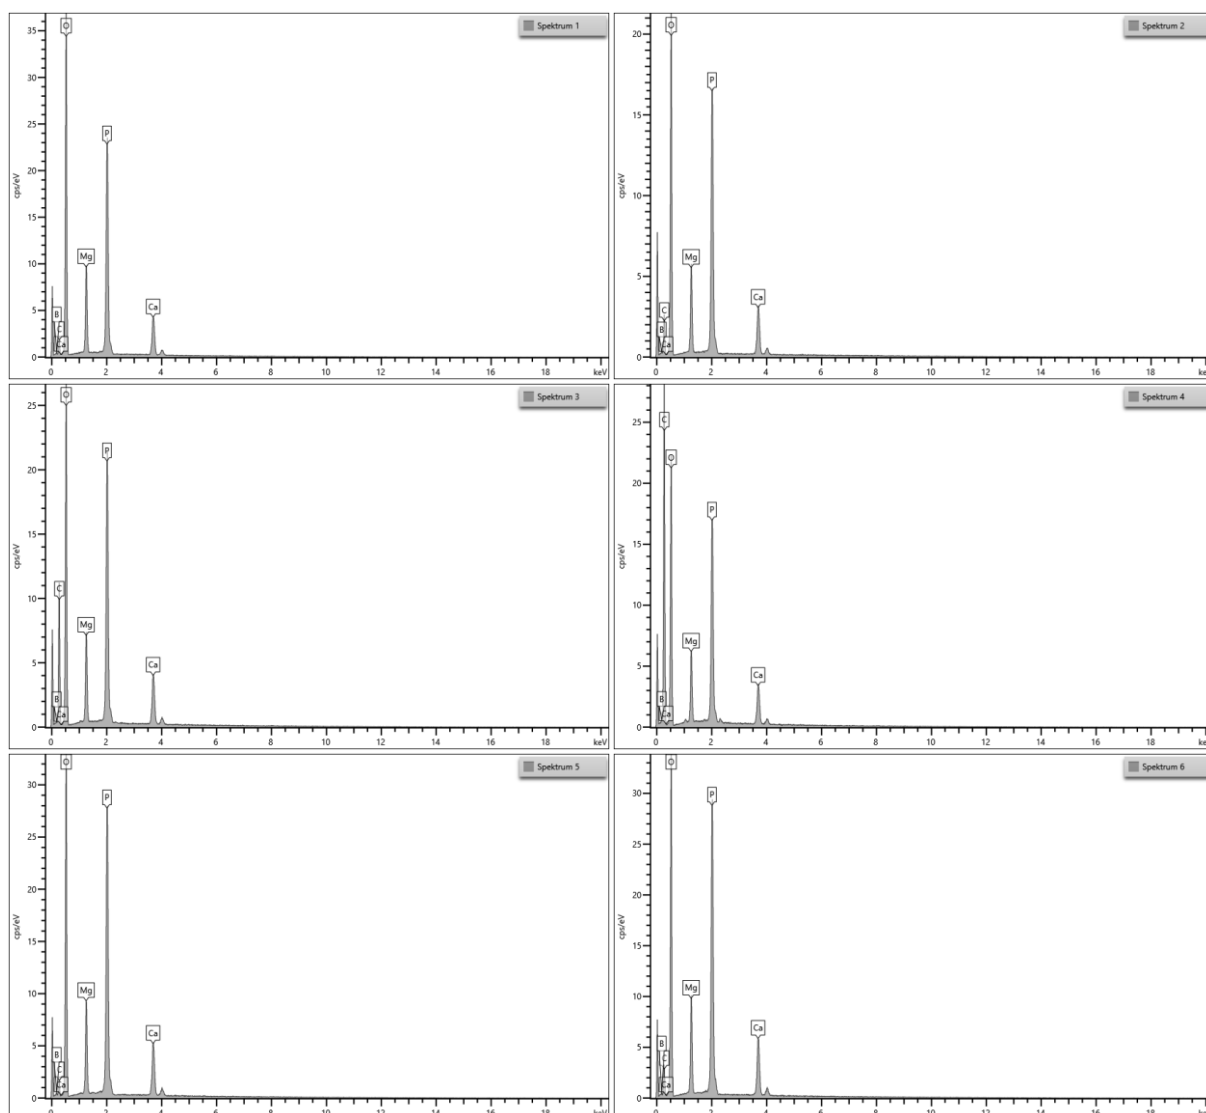

**Figure S8.** Energy dispersive X-ray spectra of  $\text{Ca}_{0.5}\text{Mg}(\text{H}_2\text{O})_2[\text{B}(\text{PO}_4)_2]\cdot\text{H}_2\text{O}$ .

**Table S14.** Summary of energy dispersive X-ray spectroscopy of  $\text{Ca}_{0.5}\text{Mg}(\text{H}_2\text{O})_2[\text{B}(\text{PO}_4)_2]\cdot\text{H}_2\text{O}$  of the relevant ions compared to the expected values out of the sum formula from single-crystal X-ray diffraction. The elements B and O are neglected due to limit of accuracy of EDS measurements for light elements

| $\text{Ca}_{0.5}\text{Mg}(\text{H}_2\text{O})_2[\text{B}(\text{PO}_4)_2]\cdot\text{H}_2\text{O}$ | $\emptyset$ (Mass %) | Normalised to Ca | Expected according to sum formula |
|--------------------------------------------------------------------------------------------------|----------------------|------------------|-----------------------------------|
| Ca                                                                                               | 2.71                 | 1                | 1                                 |
| Mg                                                                                               | 5.40                 | 2                | 2                                 |
| P                                                                                                | 11.19                | 4                | 4                                 |

## Ca<sub>0.5</sub>Mn(H<sub>2</sub>O)<sub>2</sub>[B(PO<sub>4</sub>)<sub>2</sub>]·H<sub>2</sub>O

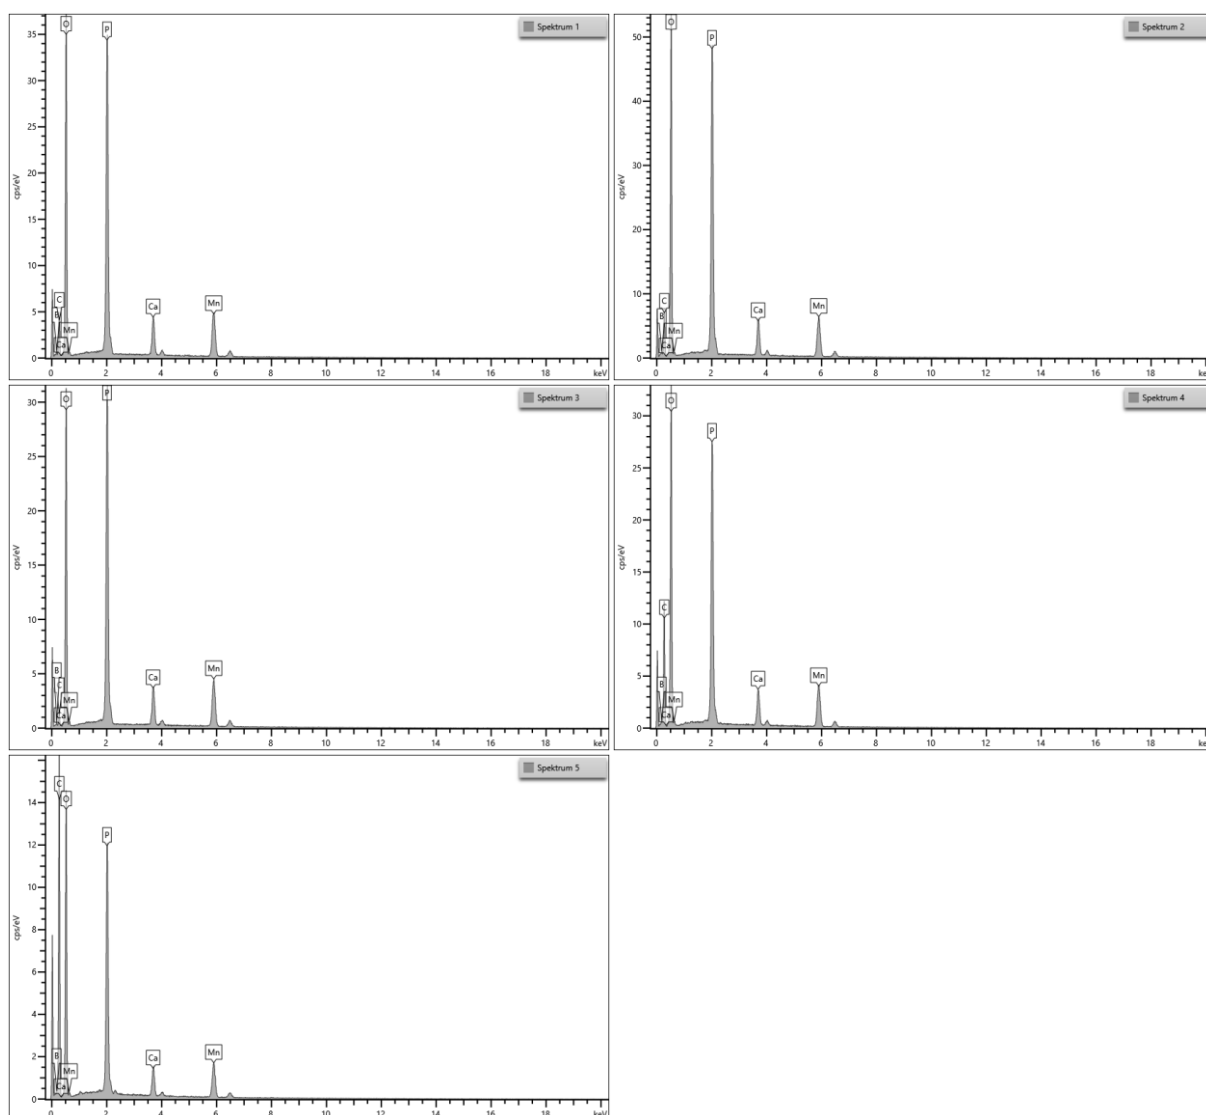

**Figure S9.** Energy dispersive X-ray spectra of Ca<sub>0.5</sub>Mn(H<sub>2</sub>O)<sub>2</sub>[B(PO<sub>4</sub>)<sub>2</sub>]·H<sub>2</sub>O.

**Table S15.** Summary of energy dispersive X-ray spectroscopy of Ca<sub>0.5</sub>Mn(H<sub>2</sub>O)<sub>2</sub>[B(PO<sub>4</sub>)<sub>2</sub>]·H<sub>2</sub>O of the relevant ions compared to the expected values out of the sum formula from single-crystal X-ray diffraction. The elements B and O are neglected due to limit of accuracy of EDS measurements for light elements

| Ca <sub>0.5</sub> Mn(H <sub>2</sub> O) <sub>2</sub> [B(PO <sub>4</sub> ) <sub>2</sub> ]·H <sub>2</sub> O | ∅ (Mass %) | Normalised to Ca | Expected according to sum formula |
|----------------------------------------------------------------------------------------------------------|------------|------------------|-----------------------------------|
| Ca                                                                                                       | 1.87       | 1                | 1                                 |
| Mn                                                                                                       | 3.89       | 2                | 2                                 |
| P                                                                                                        | 12.06      | 6                | 4                                 |

# Ca<sub>0.5</sub>Co(H<sub>2</sub>O)<sub>2</sub>[B(PO<sub>4</sub>)<sub>2</sub>]·H<sub>2</sub>O

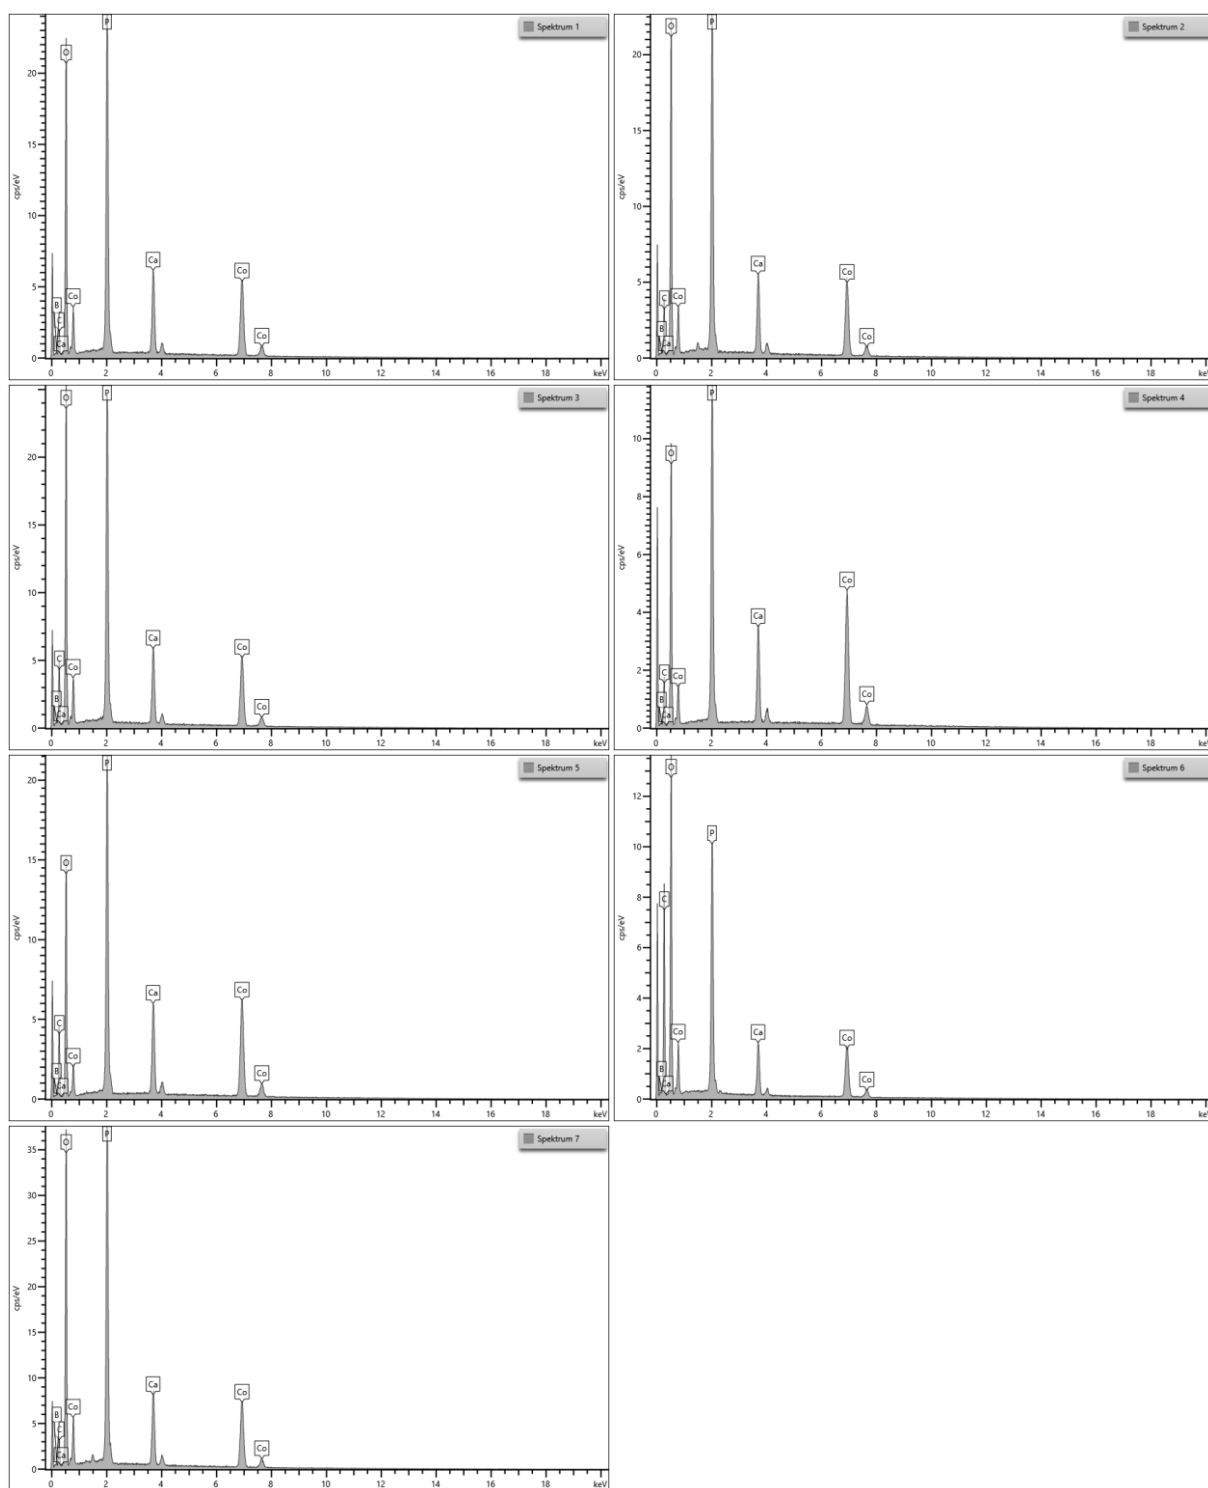

**Figure S10.** Energy dispersive X-ray spectra of Ca<sub>0.5</sub>Co(H<sub>2</sub>O)<sub>2</sub>[B(PO<sub>4</sub>)<sub>2</sub>]·H<sub>2</sub>O.

**Table S16.** Summary of energy dispersive X-ray spectroscopy of Ca<sub>0.5</sub>Co(H<sub>2</sub>O)<sub>2</sub>[B(PO<sub>4</sub>)<sub>2</sub>]·H<sub>2</sub>O of the relevant ions compared to the expected values out of the sum formula from single-crystal X-ray diffraction. The elements B and O are neglected due to limit of accuracy of EDS measurements for light elements

| Ca <sub>0.5</sub> Co(H <sub>2</sub> O) <sub>2</sub> [B(PO <sub>4</sub> ) <sub>2</sub> ]·H <sub>2</sub> O | ∅ (Mass %) | Normalised to Ca | Expected according to sum formula |
|----------------------------------------------------------------------------------------------------------|------------|------------------|-----------------------------------|
|----------------------------------------------------------------------------------------------------------|------------|------------------|-----------------------------------|

---

|    |       |   |   |
|----|-------|---|---|
| Ca | 3.83  | 1 | 1 |
| Co | 9.17  | 2 | 2 |
| P  | 13.07 | 3 | 4 |

---

# Ca<sub>0.5</sub>Zn(H<sub>2</sub>O)<sub>2</sub>[B(PO<sub>4</sub>)<sub>2</sub>]·H<sub>2</sub>O

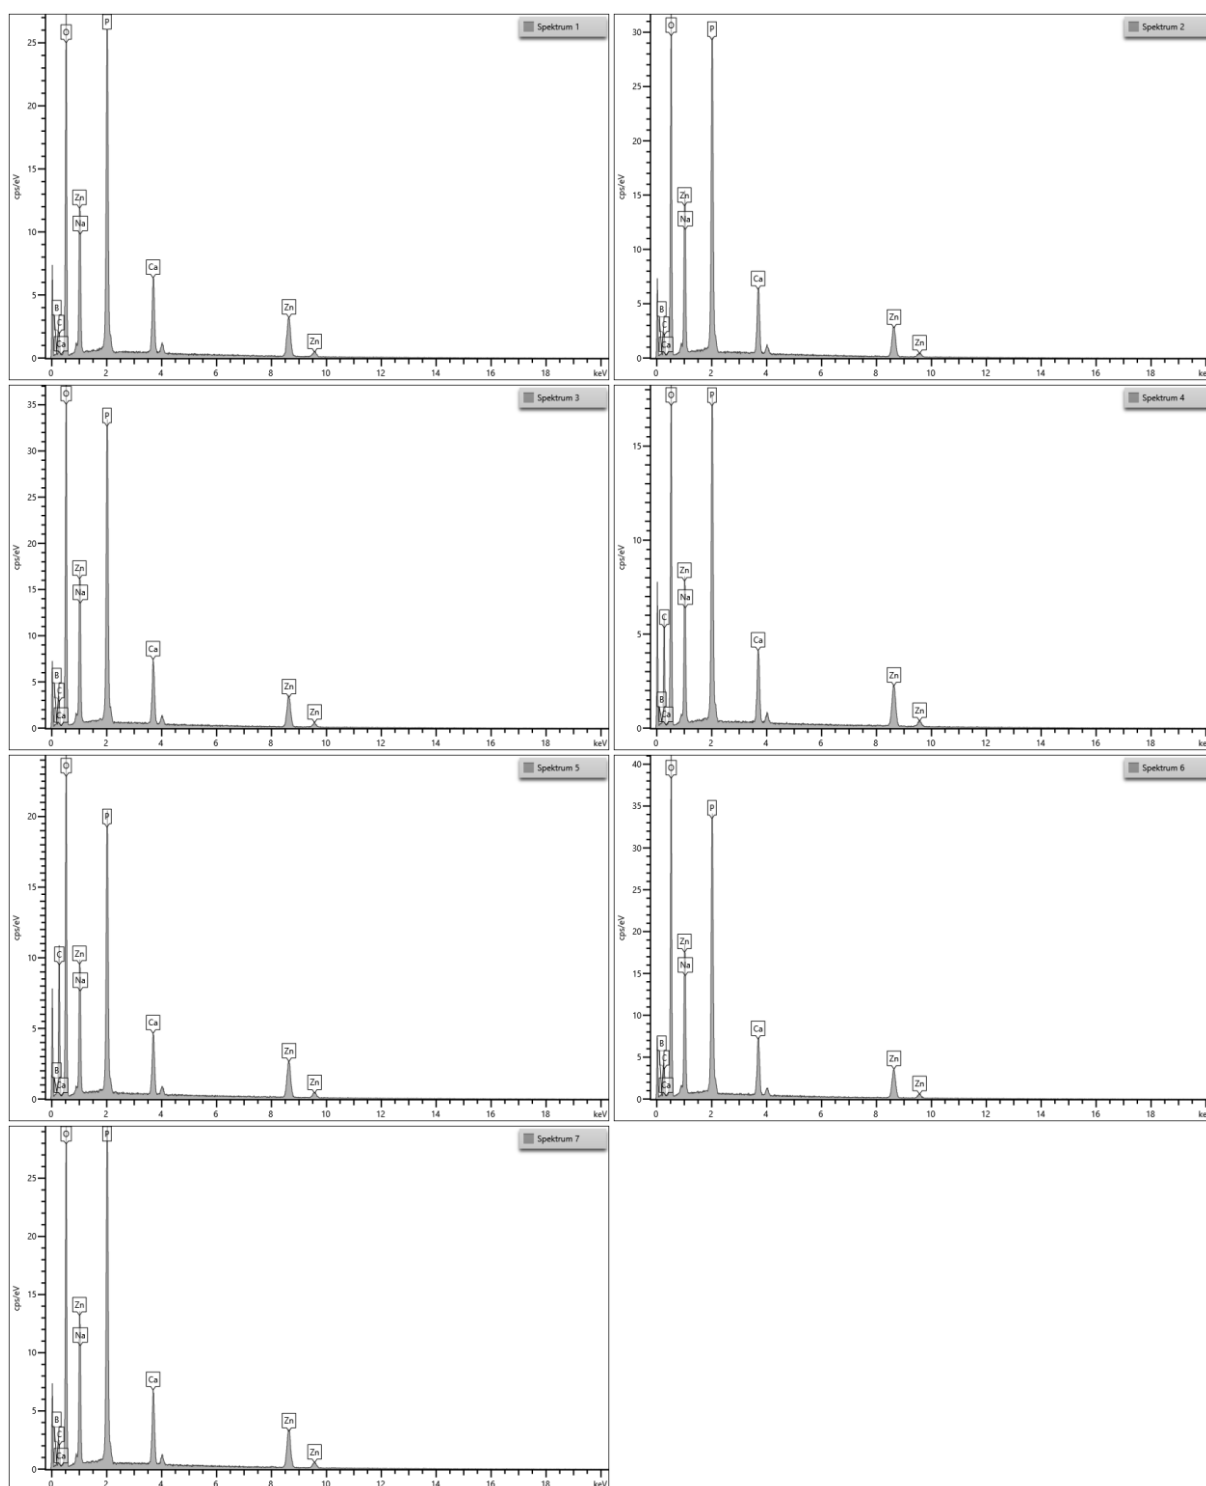

**Figure S11.** Energy dispersive X-ray spectra of Ca<sub>0.5</sub>Zn(H<sub>2</sub>O)<sub>2</sub>[B(PO<sub>4</sub>)<sub>2</sub>]·H<sub>2</sub>O.

**Table S17.** Summary of energy dispersive X-ray spectroscopy of Ca<sub>0.5</sub>Zn(H<sub>2</sub>O)<sub>2</sub>[BO<sub>6</sub>(PO<sub>4</sub>)<sub>2</sub>]·H<sub>2</sub>O of the relevant ions compared to the expected values out of the sum formular from single-crystal X-ray diffraction. The elements B and O are neglected due to limit of accuracy of EDS measurements for light elements

| Ca <sub>0.5</sub> Zn(H <sub>2</sub> O) <sub>2</sub> [B(PO <sub>4</sub> ) <sub>2</sub> ]·H <sub>2</sub> O | ∅ (Mass %) | Normalised to Ca | Expected according to sum formula |
|----------------------------------------------------------------------------------------------------------|------------|------------------|-----------------------------------|
|----------------------------------------------------------------------------------------------------------|------------|------------------|-----------------------------------|

---

|    |       |   |   |
|----|-------|---|---|
| Ca | 3.12  | 1 | 1 |
| Zn | 6.23  | 2 | 2 |
| P  | 12.17 | 4 | 4 |

---

# Ca<sub>0.5</sub>Zn(H<sub>2</sub>O)<sub>2</sub>[B(PO<sub>4</sub>)<sub>2</sub>]·H<sub>2</sub>O

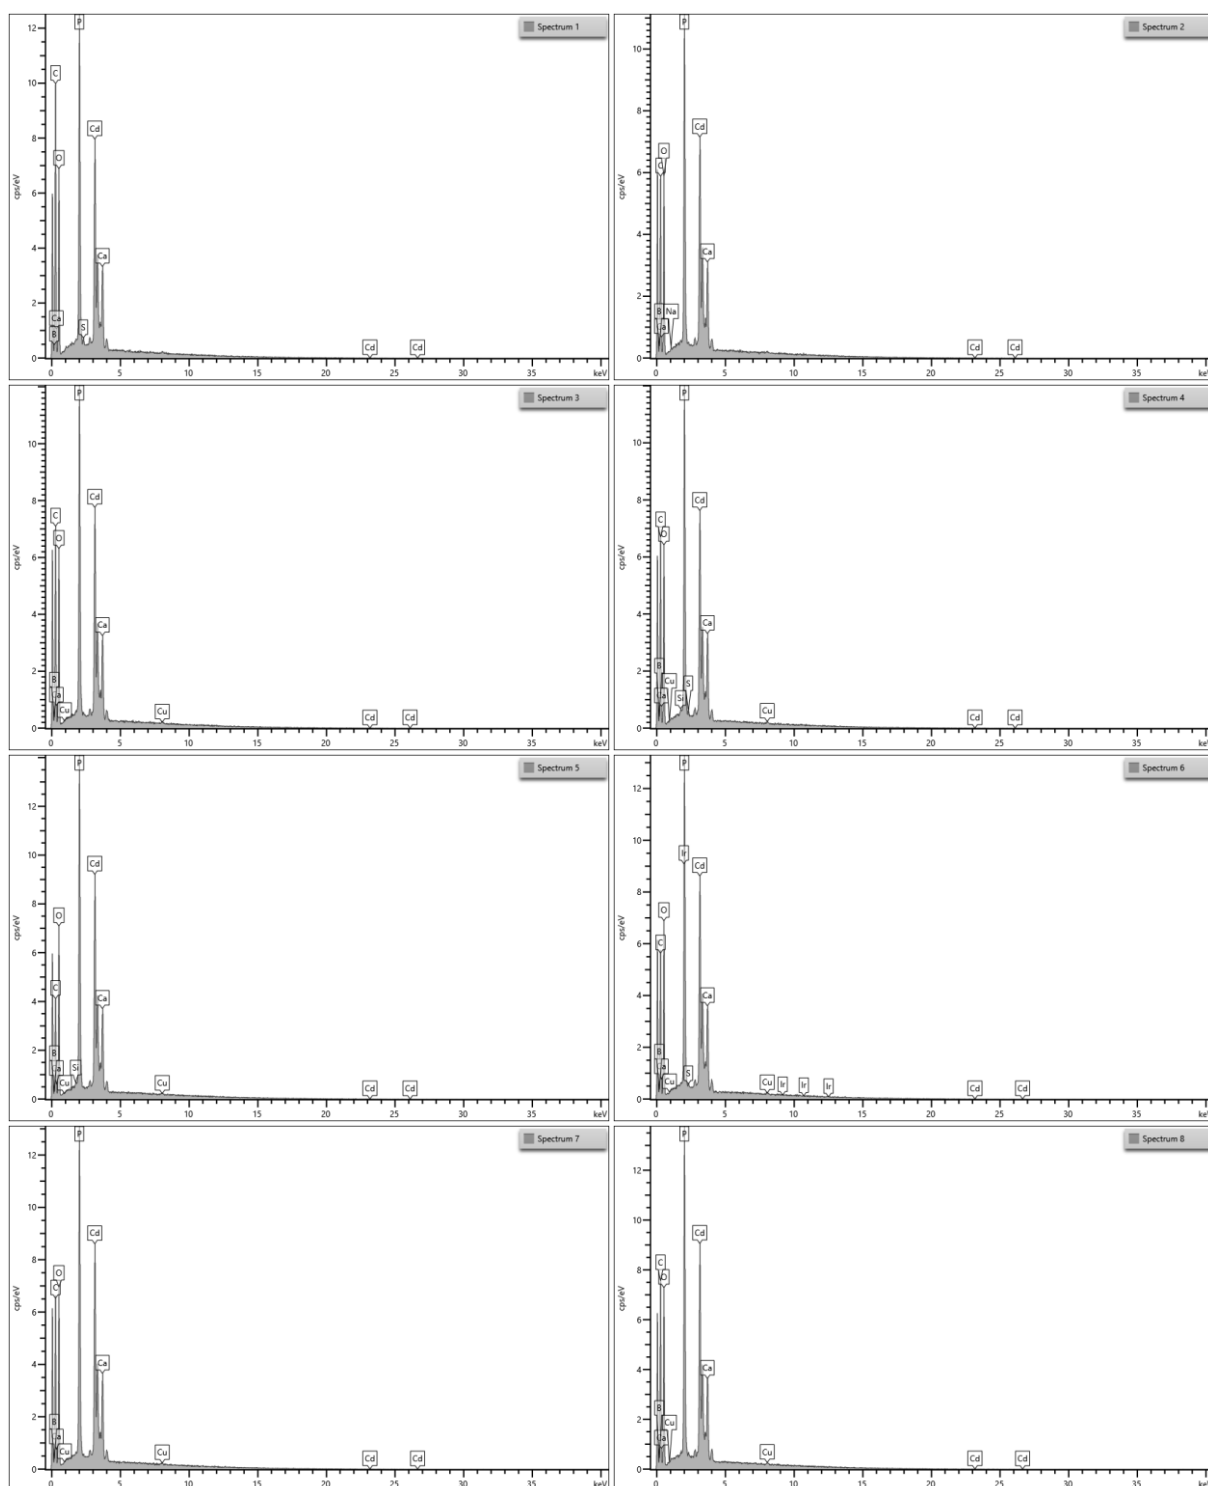

**Figure S12.** Energy dispersive X-ray spectra of Ca<sub>0.5</sub>Cd(H<sub>2</sub>O)<sub>2</sub>[B(PO<sub>4</sub>)<sub>2</sub>]·H<sub>2</sub>O.

**Table S18.** Summary of energy dispersive X-ray spectroscopy of Ca<sub>0.5</sub>Zn(H<sub>2</sub>O)<sub>2</sub>[BO<sub>6</sub>(PO<sub>4</sub>)<sub>2</sub>]·H<sub>2</sub>O of the relevant ions compared to the expected values out of the sum formula from single-crystal X-ray diffraction. The elements B and O are neglected due to limit of accuracy of EDS measurements for light elements

| Ca <sub>0.5</sub> Cd(H <sub>2</sub> O) <sub>2</sub> [B(PO <sub>4</sub> ) <sub>2</sub> ]·H <sub>2</sub> O | ∅ (Mass %) | Normalised to Ca | Expected according to sum formula |
|----------------------------------------------------------------------------------------------------------|------------|------------------|-----------------------------------|
|----------------------------------------------------------------------------------------------------------|------------|------------------|-----------------------------------|

---

|    |      |   |   |
|----|------|---|---|
| Ca | 0.75 | 1 | 1 |
| Cd | 1.54 | 2 | 2 |
| P  | 2.99 | 4 | 4 |

---

## Selected Ionic Radii after Shannon

**Table S19.** Ionic radii / pm after Shannon<sup>[4]</sup> with respect to their coordination number

| Ion | Charge | Coordination | Ionic radius / pm |
|-----|--------|--------------|-------------------|
| Mg  | 2      | VI           | 72                |
| Mn  | 2      | VI           | 83 (high spin)    |
| Co  | 2      | VI           | 75 (high spin)    |
| Zn  | 2      | VI           | 74                |
| Cd  | 2      | VI           | 95                |
| Ca  | 2      | VI           | 100               |
| Ca  | 2      | VII          | 106               |
| B   | 3      | IV           | 11                |
| P   | 5      | IV           | 17                |
| O   | -2     | II           | 135               |
| O   | -2     | III          | 136               |
| O   | -2     | IV           | 138               |

öä

## MAPLE Calculations

**Table S20.** Calculated MAPLE values of the binary and tertiary compounds

| Compound                                     | MAPLE Value in kJ mol <sup>-1</sup> |
|----------------------------------------------|-------------------------------------|
| P <sub>2</sub> O <sub>5</sub> <sup>[5]</sup> | 42887                               |
| B <sub>2</sub> O <sub>3</sub> <sup>[6]</sup> | 21924                               |
| CaO <sup>[7]</sup>                           | 4048                                |
| H <sub>2</sub> O <sup>[8]</sup>              | 5017                                |
| MgO <sup>[9]</sup>                           | 4605                                |
| MnO <sup>[9]</sup>                           | 4368                                |
| CoO <sup>[9]</sup>                           | 4555                                |
| ZnO <sup>[10]</sup>                          | 4612                                |
| CdO <sup>[11]</sup>                          | 4105                                |

## Symmetry Reduction and Systematically Absent Reflections

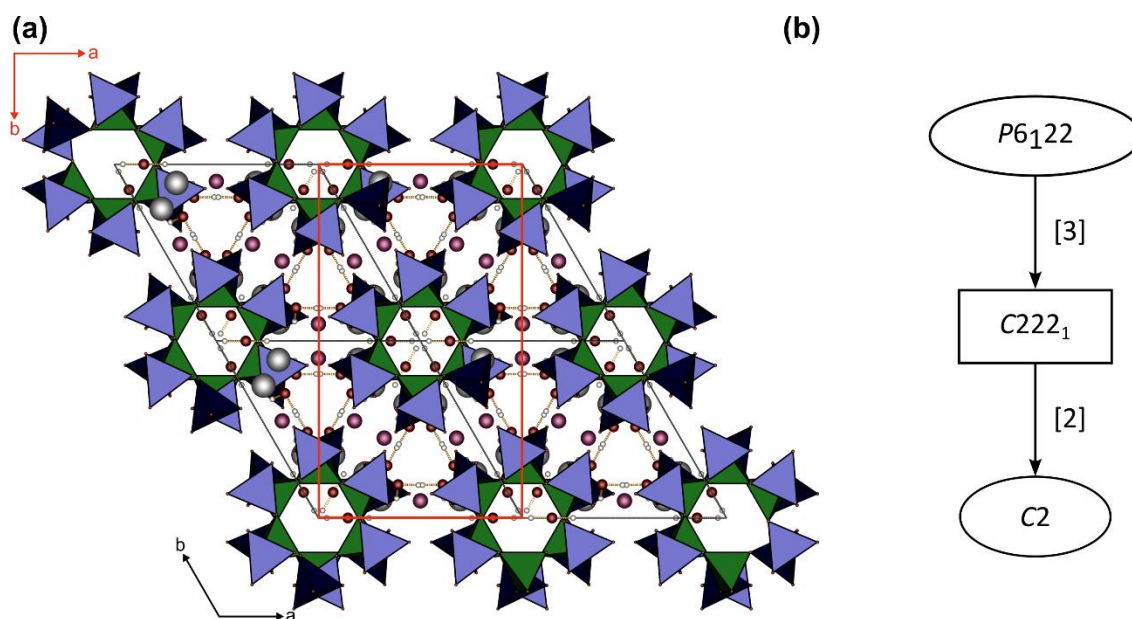

**Figure S13.** Relationship of the axis between the hexagonal (black) and monoclinic (red) crystal system (a) and schematic group-subgroup graph with index 6 (b).

**Table S21.** Comparison of refinement parameters during the symmetry reduction from the hexagonal to the monoclinic system

|    |           | $P6_522/P6_122$ | $C222_1$ | $C211$ | $P3_121/P3_221$ |
|----|-----------|-----------------|----------|--------|-----------------|
| Mg | $R_{int}$ | 0.1797          | 0.1585   | 0.1534 | 0.1628          |
|    | $R_1$     | 0.0460          | 0.0580   | 0.0655 | 0.0357          |
|    | $wR_2$    | 0.1199          | 0.0675   | 0.0683 | 0.0697          |
|    | WGHT      | 0.0489          | 0.0294   | 0.0233 | 0.0347          |
| Mn | $R_{int}$ | 0.1209          | 0        | 0      | 0               |
|    | $R_1$     | 0.1110          | 0.1099   | 0.1080 | 0.1104          |
|    | $wR_2$    | 0.0263          | 0.0317   | 0.0378 | 0.0300          |
|    | WGHT      | 0.0640          | 0.0648   | 0.0704 | 0.0649          |
| Co | $R_{int}$ | 0.0353          | 0.0366   | 0.0376 | 0.0354          |
|    | $R_1$     | 0.8437          | 0.8802   | 0      | 0.5247          |
|    | $wR_2$    | 0.0613          | 0.0422   | 0.1388 | 0.1447          |
|    | WGHT      | 0.0308          | 0.0242   | 0.0520 | 0.0296          |
| Zn | $R_{int}$ | 0.0958          | 0.0649   | 0.0587 | 0.0533          |
|    | $R_1$     | 0.0421          | 0.0400   | 0.0183 | 0.0251          |
|    | $wR_2$    | 0.05486         | 1.7501   | 0      | 0               |
|    | WGHT      | 0.0467          | 0.0279   | 0.0266 | 0.0284          |
| Cd | $R_{int}$ | 0.0370          | 0.0215   | 0.0223 | 0.0244          |
|    | $R_1$     | 0.1170          | 0.0568   | 0.0564 | 0.0649          |
|    | $wR_2$    | 0.0421          | 0.0219   | 0.0164 | 0.0306          |
|    | WGHT      | 0.5886          | 5.7433   | 4.8408 | 1.8764          |
|    | $R_{int}$ | 0.2309          | -        | 0.1968 | 0.2097          |
|    | $R_1$     | 0.0455          | -        | 0.0914 | 0.0687          |
|    | $wR_2$    | 0.0556          | -        | 0.0299 | 0.0467          |
|    | WGHT      | 0.0228          | -        | 0      | 0.0119          |
|    |           | 0               | -        | 0      | 0               |

**Table S22.** First 21 systematically absent reflections rejected in  $\text{Ca}_{0.5}\text{Mn}(\text{H}_2\text{O})_2[\text{B}(\text{PO}_4)_2]\cdot\text{H}_2\text{O}$ , refined in the hexagonal space group  $P6_122$ . 190 systematically absent reflections rejected were observed in total

| h | k | l  | Fo <sup>2</sup> | Sigma | Why rejected                       |
|---|---|----|-----------------|-------|------------------------------------|
| 0 | 0 | 3  | 1.16            | 0.25  | systematically absent but >3sig(I) |
| 0 | 0 | 3  | 1.73            | 0.25  | systematically absent but >3sig(I) |
| 0 | 0 | 3  | 1.29            | 0.25  | systematically absent but >3sig(I) |
| 0 | 0 | 3  | 1.16            | 0.24  | systematically absent but >3sig(I) |
| 0 | 0 | 3  | 1.41            | 0.28  | systematically absent but >3sig(I) |
| 0 | 0 | 3  | 1.29            | 0.24  | systematically absent but >3sig(I) |
| 0 | 0 | 3  | 1.41            | 0.25  | systematically absent but >3sig(I) |
| 0 | 0 | 3  | 1.44            | 0.28  | systematically absent but >3sig(I) |
| 0 | 0 | 3  | 1.63            | 0.25  | systematically absent but >3sig(I) |
| 0 | 0 | 3  | 1.22            | 0.24  | systematically absent but >3sig(I) |
| 0 | 0 | 3  | 1.70            | 0.29  | systematically absent but >3sig(I) |
| 0 | 0 | 3  | 1.35            | 0.11  | systematically absent but >3sig(I) |
| 0 | 0 | 3  | 1.59            | 0.24  | systematically absent but >3sig(I) |
| 0 | 0 | 3  | 1.78            | 0.24  | systematically absent but >3sig(I) |
| 0 | 0 | 3  | 1.87            | 0.32  | systematically absent but >3sig(I) |
| 0 | 0 | 3  | 0.68            | 0.12  | systematically absent but >3sig(I) |
| 0 | 0 | 9  | 0.66            | 0.16  | systematically absent but >3sig(I) |
| 0 | 0 | 9  | 0.69            | 0.18  | systematically absent but >3sig(I) |
| 0 | 0 | 9  | 0.86            | 0.14  | systematically absent but >3sig(I) |
| 0 | 0 | 15 | 0.81            | 0.26  | systematically absent but >3sig(I) |
| 0 | 0 | 17 | 0.99            | 0.33  | systematically absent but >3sig(I) |

**Table S23.** Systematically absent violations in  $\text{Ca}_{0.5}\text{Mn}(\text{H}_2\text{O})_2[\text{B}(\text{PO}_4)_2]\cdot\text{H}_2\text{O}$ , refined in the orthorhombic space group  $C222_1$ . 18 systematically absent violations were observed in total

| h | k | l | Fo <sup>2</sup> | Sigma | Why rejected                                 |
|---|---|---|-----------------|-------|----------------------------------------------|
| 0 | 0 | 3 | 1.16            | 0.25  | observed but should be systematically absent |
| 0 | 0 | 3 | 1.73            | 0.25  | observed but should be systematically absent |
| 0 | 0 | 3 | 1.29            | 0.25  | observed but should be systematically absent |
| 0 | 0 | 3 | 1.16            | 0.24  | observed but should be systematically absent |
| 0 | 0 | 3 | 1.41            | 0.28  | observed but should be systematically absent |
| 0 | 0 | 3 | 1.29            | 0.24  | observed but should be systematically absent |
| 0 | 0 | 3 | 1.41            | 0.25  | observed but should be systematically absent |
| 0 | 0 | 3 | 1.44            | 0.28  | observed but should be systematically absent |
| 0 | 0 | 3 | 1.63            | 0.25  | observed but should be systematically absent |
| 0 | 0 | 3 | 1.22            | 0.24  | observed but should be systematically absent |
| 0 | 0 | 3 | 1.70            | 0.29  | observed but should be systematically absent |
| 0 | 0 | 3 | 1.35            | 0.11  | observed but should be systematically absent |
| 0 | 0 | 3 | 1.59            | 0.24  | observed but should be systematically absent |
| 0 | 0 | 3 | 1.78            | 0.24  | observed but should be systematically absent |
| 0 | 0 | 3 | 1.87            | 0.32  | observed but should be systematically absent |
| 0 | 0 | 9 | 0.68            | 0.12  | observed but should be systematically absent |
| 0 | 0 | 9 | 0.66            | 0.16  | observed but should be systematically absent |
| 0 | 0 | 9 | 0.69            | 0.14  | observed but should be systematically absent |

**Table S24.** Chain stretching factors  $f_s^1$  and pitch-to-radius ratios  $\xi^2$  of the titled compounds  $\text{Ca}_{0.5}\text{M}(\text{H}_2\text{O})_2[\text{B}(\text{PO}_4)_2]\cdot\text{H}_2\text{O}$  ordered according to their relative ionic radii

| M  | $L$   | $m$  | $r$  | $f_s$ | $\xi$ |
|----|-------|------|------|-------|-------|
| Mg | 15.73 | 3.61 | 2.47 | 0.727 | 6.36  |
| Zn | 15.59 | 3.62 | 2.53 | 0.717 | 6.17  |
| Co | 15.71 | 3.62 | 2.50 | 0.723 | 6.27  |
| Mn | 15.81 | 3.64 | 2.52 | 0.723 | 6.29  |
| Cd | 15.93 | 3.66 | 2.55 | 0.725 | 6.25  |

<sup>1</sup>  $f_s = L / (m P)$  with pitch length  $L$  repetition unit length  $m$ , and periodicity  $P$  (here  $P=6$ )  
<sup>2</sup>  $\xi = L / r$

PLATON

PLATON/ADDSYM for VW68\_C222 Ln C222(1), C1 (Aust)

ADDSYM Search on ALL NON-H Chemical Types (Max NonFlt 0 Perc)

Criteria 0.80 Deg (Metric), 0.25 Ang (Rot), 0.25 Ang (Inv), 0.25 Ang (Transl)

Symm. Input Reduced (Ang) (Deg) Perc AvrDev. (Ang) Input Cell

Elem Cell\_Row Cell\_Row d Typ Dot Angle Flt MaxDev. x y z

|     |            |            |       |   |   |      |     |       |         |           |     |
|-----|------------|------------|-------|---|---|------|-----|-------|---------|-----------|-----|
| 3 * | [ 0 0 1 ]  | [ 0 0 -1 ] | 15.81 | 6 | 1 | 0.02 | 100 | 0.006 | Through | 1/3-0.001 | 0   |
| 1   |            |            |       |   |   | 05   | -05 | 0.013 | Screw   | 0         | 1/3 |
| 2   | [ 0 1 0 ]  | [ 1 -1 0 ] | 9.57  | 2 | 2 | 0    | 100 | 0     | Through | 1/2       | 1/2 |
| 2 * | [ 1 1 0 ]  | [ 0 -1 0 ] | 9.57  | 2 | 2 | 0.02 | 100 | 0.005 | Through | 3/4 0.749 | 1/3 |
| 2 * | [ 1 -1 0 ] | [ 1 0 0 ]  | 9.57  | 2 | 2 | 0.02 | 100 | 0.006 | Through | 1/4 0.749 | 1/6 |
|     |            |            |       |   |   | 05   | -05 | 0.013 |         |           |     |

Reduced-to-Convent      Input-to-Reduced      T = Input-to-Convent:      a' = T a

$$\begin{pmatrix} -1 & 0 & 0 \\ 0 & 1 & 0 \\ 0 & 0 & -1 \end{pmatrix} \times \begin{pmatrix} -1/2 & 1/2 & 0 \\ -1/2 & -1/2 & 0 \\ 0 & 0 & 1 \end{pmatrix} = \begin{pmatrix} 1/2 & -1/2 & 0 \\ -1/2 & -1/2 & 0 \\ 0 & 0 & -1 \end{pmatrix} \quad \text{Det (T)} = 0.500$$

| Cell    | Lattice | a      | b     | c      | Alpha | Beta  | Gamma  | Volume | CrystalSystem | Lave |
|---------|---------|--------|-------|--------|-------|-------|--------|--------|---------------|------|
| Input   | mC      | 16.571 | 9.568 | 15.810 | 90.00 | 90.02 | 90.00  | 2507   | monoclinic    | 2/m  |
| Reduced | P       | 9.567  | 9.567 | 15.810 | 89.98 | 89.98 | 60.00  | 1253   |               |      |
| Convent | hP      | 9.567  | 9.567 | 15.810 | 90.02 | 89.98 | 120.00 | 1253   | trigonal      | -3m  |

:: Origin Shifted to: 0.001, 0.001, -0.500 after Cell Transformation

Missed/Additional Symmetry : Suggested SPGR = P3121 (No 152)

**Figure S14.** Platon ADDSYM report of  $\text{Ca}_{0.5}\text{Mn}(\text{H}_2\text{O})_2[\text{B}(\text{PO}_4)_2] \cdot \text{H}_2\text{O}$  in C211 (no. 5). Due to the pseudosymmetry, the hexagonal space group  $P6_122$  (no. 178) is suggested.

## References

- [1] B. N. Figgis, M. A. Hitchman, *Ligand field theory and its applications*, Wiley-VCH, New York **2000**.
- [2] D. A. Cruse, J. E. Davies, H. H. Harding, M. Gerloch, D. J. Mackey, R. F. McMeeking, *CAMMAG, a Fortran Program*, Cambridge **1980**.
- [3] *Origin(Pro)*, OriginLab Corporation, Northampton, MA, USA.
- [4] R. D. Shannon, *Acta Cryst. A* **1976**, 32, 751.
- [5] M. Jansen, B. Lürer, *Z. Kristallogr. Cryst. Mater.* **1986**, 177, 149.
- [6] G. E. Gurr, P. W. Montgomery, C. D. Knutson, B. T. Gorres, *Acta Cryst. B* **1970**, 26, 906.
- [7] C. Ablitt, H. McCay, S. Craddock, L. Cooper, E. Reynolds, A. A. Mostofi, N. C. Bristowe, C. A. Murray, M. S. Senn, *Chem. Mater.* **2020**, 32, 605.
- [8] A. Goto, T. Hondoh, S. Mae, *J. Chem. Phys.* **1990**, 93, 1412.
- [9] S. Sasaki, K. Fujino, Y. Takéuchi, *Proc. Jpn. Acad., Ser. B* **1979**, 55, 43.
- [10] S. C. Abrahams, J. L. Bernstein, *Acta Cryst B* **1969**, 25, 1233.
- [11] P. Scherrer, *Z. Kristallogr. Cryst. Mater.* **1922**.
